1 **Rest functional brain maturation during the first year of life**

2 Hervé Lemaître<sup>a,b†\*</sup> and Pierre Augé<sup>a†</sup>, Ana Saitovitch<sup>a</sup>, Alice Vinçon-Leite<sup>a</sup>, Jean-Marc  
3 Tacchella<sup>a</sup>, Ludovic Fillon<sup>a</sup>, Raphael Calmon<sup>a</sup>, Volodia Dangouloff-Ros<sup>a</sup>, Raphaël Lévy<sup>a</sup>, David  
4 Grévent<sup>a</sup>, Francis Brunelle<sup>a</sup>, Nathalie Boddaert<sup>a</sup>, Monica Zilbovicius<sup>a</sup>

5 **Author affiliation**

6 *“a” INSERM UA10, Department of Pediatric Radiology, Hôpital Necker Enfants Malades, AP-  
7 HP, Imagine Institute (UMR 1163), Paris Descartes University, Sorbonne Paris Cité University.*

8 *“b” Groupe d’Imagerie Neurofonctionnelle, Institut des Maladies Neurodégénératives (CNRS  
9 UMR 5293), Université de Bordeaux.*

10 *† Both authors contributed equally for this work*

11 *\*Correspondence and material request should be addressed to Hervé Lemaître  
12 ([herve.lemaitre@u-bordeaux.fr](mailto:herve.lemaitre@u-bordeaux.fr))*

13

14 **Abstract**

15 The first year of life is a key period of brain development, characterized by dramatic  
16 structural and functional modifications. Here, we measured rest cerebral blood flow (CBF)  
17 modifications throughout babies' first year of life using arterial spin labeling magnetic  
18 resonance imaging sequence in 52 infants, from 3 to 12 months of age. Overall, global rest  
19 CBF significantly increased during this age span. In addition, we found marked regional  
20 differences in local functional brain maturation. While primary sensorimotor cortices and  
21 insula showed early maturation, temporal and prefrontal region presented great rest CBF  
22 increase across the first year of life. Moreover, we highlighted a late and remarkably  
23 synchronous maturation of the prefrontal and posterior superior temporal cortices. These  
24 different patterns of regional cortical rest CBF modifications reflect a timetable of local  
25 functional brain maturation and are consistent with baby's cognitive development within the  
26 first year of life.

27 **Keywords:**

28 Infants brain maturation, Rest cerebral blood flow, Neurodevelopment, ASL-MRI

29

## 30 **Introduction**

31 The human brain is still immature at birth and undergoes dynamic structural and functional  
32 processes throughout life. During the first year, the maturation of neural networks is a  
33 complex process that is particularly important to the baby's acquisition of cognitive and  
34 motor skills (Kagan and Herschkowitz 2005). At the cortical level, development comprises  
35 both gross morphometric changes and microstructural progression (Dubois et al. 2014). The  
36 first year of life is therefore a critical phase of postnatal brain development.

37 Historically, much of what we know about the intricate processes of early brain development  
38 comes from post-mortem studies in human fetuses, neonates, and non-human primates  
39 (Goldman-Rakic 1987; Kostovic et al. 2002; Innocenti and Price 2005). With the increasing  
40 availability of high-quality neuroimaging techniques, studying early human brain  
41 development in vivo in unprecedented detail is now feasible (Partridge et al. 2004; Fransson  
42 et al. 2007; Ball et al. 2014; van den Heuvel et al. 2015). These advances have led to exciting  
43 new insights into both healthy and atypical macroscale brain network development and  
44 have paved the way to bridge the gap between the brain's neurobiological architecture and  
45 its behavioral repertoire.

46 At the structural level, in neonates and infants, studies of cortical morphological  
47 development have focused on the modification of gray matter volume (Knickmeyer et al.  
48 2008; Gilmore et al. 2012), gyrification (Li et al. 2014), deep sulcal landmark maturation  
49 (Meng et al. 2014), thickness and surface area maturation (Lyall et al. 2015), as well as  
50 folding and fiber density (Nie et al. 2014). Structural brain imaging studies showed an  
51 increase in the gray matter volume during the first years of life (Knickmeyer et al. 2008),  
52 consistent with post-mortem studies, indicating rapid development of synapses and spines  
53 during this period (Huttenlocher and Dabholkar 1997; Petanjek et al. 2011; Webster et al.  
54 2011). Indeed, throughout late gestation, rapid synaptogenesis results in an over-abundance  
55 of synapses (up to 150% of adult values) that are subsequently pruned throughout childhood  
56 and adolescence (Huttenlocher 1979). During the first year of life, synaptogenesis is one of  
57 the most important maturational processes, and its timetable differs across cortical regions.  
58 Gilmore et al. described a posterior to anterior gradient of gray matter growth throughout  
59 the first year of life (Gilmore et al. 2007), consistent with regional differences that have been

60 described in post-mortem studies, showing an increase in synaptic density, and therefore  
61 synaptogenesis, earlier in the sensory cortex and later in the prefrontal cortex (Huttenlocher  
62 and Dabholkar 1997). In general, studies have suggested a complex pattern of development  
63 that varies based on anatomical location and cortical metrics. In addition, across early  
64 development, cortical maturation exhibits regionally specific asymmetry between the left  
65 and right hemispheres (Li et al. 2014; Nie et al. 2014). These changes continue throughout  
66 childhood and adolescence, with cortical thickness following different trajectories of  
67 thinning depending on the region, cortex type and gender (Sowell et al. 2004; Shaw et al.  
68 2008).

69 At the functional level, early brain development has been investigated using mainly three  
70 different approaches. Pioneer studies measuring metabolism and rest cerebral blood flow  
71 (CBF) were followed by activation studies using functional MRI and more recently resting  
72 state MRI studies investigating functional connectivity.

73 Rest cerebral metabolism and blood flow are an index of synaptic density, which allows the  
74 in vivo study of functional brain maturation using positron emission tomography (PET) and  
75 single-photon emission computed tomography (SPECT) (Leenders et al. 1990). These studies  
76 revealed that infants' brains showed higher rest metabolism in subcortical structures and in  
77 the sensorimotor cortex than in other regions (Chugani and Phelps 1986). In the newborn,  
78 the highest degree of glucose metabolism is in the primary sensory and motor cortex,  
79 cingulate cortex, thalamus, brain stem, cerebellar vermis and hippocampal region. During  
80 the first months of life, rest metabolism and CBF increase firstly within the primary sensory  
81 cortices, followed by the associative sensory cortices and finally within the prefrontal cortex  
82 at the end of the first year (Chugani and Phelps 1986; Chugani et al. 1987; Chiron et al.  
83 1992). At 2 to 3 months of age, glucose utilization increases in the parietal, the temporal and  
84 the primary visual cortices, basal ganglia, and cerebellar hemispheres. Between 6 and 12  
85 months of age, glucose utilization increases in the frontal cortex. These metabolic changes  
86 correspond to the emergence of motor and cognitive abilities during the first year of life.  
87 However, these studies were limited by very low spatial resolution of the brain imaging  
88 devices. In addition, these techniques required administration of ionizing radiation and,  
89 therefore, have limited application in the pediatric population.

90 Following these pioneer studies, functional MRI studies have used blood oxygen level-  
91 dependent (BOLD) contrast to measure brain activity. Task-based fMRI contributed to  
92 present-day knowledge about brain maturation shortly after birth (Dehaene-Lambertz et al.  
93 2006; Arichi et al. 2010; Allievi et al. 2016). These studies have provided important  
94 background on the brain's responses to sensory input during the early developmental phases  
95 of brain-behavior interactions. Adult-like activation patterns were observed in response to a  
96 variety of sensory stimuli, including tactile and proprioceptive stimulation (passive hand  
97 movement) (Erberich et al. 2006; Arichi et al. 2010) as well as auditory (Anderson et al. 2001)  
98 and olfactory (the odor of infant formula) (Arichi et al. 2013). Functional MRI studies in 2- to  
99 3-month-old infants demonstrated left-lateralized activation of perisylvian regions, including  
100 the superior temporal gyrus, angular gyrus and Broca's area, in response to native language  
101 speech. The response followed a hierarchical pattern, with auditory regions being activated  
102 first, followed by superior temporal regions, the temporal poles and Broca's area in the  
103 inferior frontal cortex; a pattern that is highly consistent with language organization in the  
104 mature brain (Dehaene-Lambertz et al. 2006).

105 More recently, BOLD signal has been used to conduct resting state fMRI (rs-fMRI) as a  
106 measure of temporal coherence between brain regions. This technique has provided, by  
107 studying infants during the first years of life, insight into the maturation of multiple resting  
108 state networks (RSNs). Results show that the rate at which correlations within and between  
109 RSNs develop differs by network and closely reflect known rates of cortical development  
110 based on histological evidence (Smyser and Neil 2015). The sensorimotor (SM) and attention  
111 (AN) networks seem to be the earliest developing networks with their within-network  
112 synchronization largely established before birth. This replicates several reports showing the  
113 bilateral symmetric, adult-like topology of both networks at birth (Gao et al. 2013; Lin et al.  
114 2013) or even prenatally (Smyser et al. 2010), indicating significant prenatal development of  
115 these 2 networks. In the brains of term babies, rs-fMRI studies employing seed-based  
116 connectivity or independent component analyses have identified specific functional  
117 networks, including primary visual, auditory, sensorimotor networks and default mode and  
118 executive-control networks involved in heteromodal functions (Fransson et al. 2007; Doria et  
119 al. 2010; Smyser et al. 2010). Network analyses based on graph theory further revealed that  
120 the functional connectomes of infant brains already exhibited the small-world structure.

121 Distinct from the adults, however, the hubs were largely confined to primary sensorimotor  
122 regions (Fransson et al. 2011; Gao et al. 2011). Taken together, these findings provide  
123 important insights into the early brain functional maturation process.

124 The emergence of arterial spin labeling (ASL), a technique that provides both non-invasive  
125 and regional cerebral blood flow quantification, offers new opportunities to investigate local  
126 rest brain function in neonates and children. ASL perfusion MRI uses magnetically labeled  
127 arterial blood water as a nominally diffusible flow tracer. By labeling the blood water  
128 proximal to the target imaging region, the perfusion signal is subsequently calculated by  
129 comparison with a separate image acquired using a control pulse without labeling the blood  
130 flow to remove the static background signal and control for magnetization transfer effects  
131 (Williams et al. 1992). Therefore, ASL MRI non-invasively assesses brain perfusion and allows  
132 for a quantitative measurement of rest CBF without the administration of contrast material  
133 or exposure to ionizing radiation (Detre and Alsop 1999). Compared with BOLD, ASL has  
134 several benefits by providing (1) an absolute quantitative measure of brain function through  
135 CBF signaling, (2) not a derived measure from the BOLD signal affected by numerous  
136 physiological and noise contributions, and (3) an increased spatial specificity to neuronal  
137 activity due to the capillary/tissue origin of the ASL signal (Detre et al. 2009; Chen et al.  
138 2015). Then, ASL MRI has been used to measure rest CBF to better characterize brain  
139 maturation in children after the first year of life (Biagi et al. 2007; Paniukov et al. 2020).  
140 Indeed, in a very recent study, Paniukov et al. (Paniukov et al. 2020) followed longitudinally  
141 children between 2 and 7 years and showed a constant CBF increase across different regions  
142 of the prefrontal, temporal, parietal and occipital cortex. However, knowledge about the  
143 first year of life remains rather scarce. Wang et al. (Wang et al. 2008) by comparing 7- and  
144 13-month old infants showed a regional CBF increase in the hippocampi, anterior cingulate,  
145 amygdala, occipital lobe and auditory cortex. Duncan et al. (Duncan et al. 2014) studied  
146 infants from 3 to 5 months and described a significantly greater rest CBF in the orbitofrontal,  
147 subgenual and inferior occipital regions.

148 In this study, in order to characterize CBF developmental trajectories, we have measured  
149 age-related changes of local rest CBF at the voxel level and regionally throughout the first  
150 year of life using ASL perfusion MRI. We hypothesized that this crucial age range is  
151 characterized by different regional patterns of brain development, mainly between primary

152 and associative regions, that in turn reflect cognitive development of the baby during the  
153 first year.

## 154 **Materials and Methods**

155 **Subject.** Eighty-five babies from the Necker-Enfants-Malades hospital were initially included  
156 in this study. The inclusion criteria were normal clinical multimodal MRI, absence of  
157 prematurity, neurological or cranial pathology, parent's consanguinity or abnormal  
158 psychomotor development. Were included infants presenting syndromes that are not  
159 originally neurological, mainly dermatological or ophthalmological, but request an MRI to  
160 discard infrequent associated brain abnormalities, that may be present in a small percentage  
161 of cases (see SI Appendix, Table S1). Normal psychomotor development was assured in  
162 follow-up consultations. Our final sample included 52 babies (29 girls) from 3 to 12 months  
163 of age in our study, including 10 babies at 3 and 4 months (90 to 120 days), 14 at 5 and 6  
164 months (120 to 180 days), 14 at 7 and 8 months (180 to 240 days), 7 at 9 and 10 months  
165 (240 to 300 days), 7 at 11 and 12 months (300 to 375 days). The Ethical Committee of French  
166 Public Hospitals approved this study and the written informed consent was obtained for all  
167 participants.

168 **MRI acquisition.** All MRI exams included whole brain T1-weighted and ASL sequences and  
169 were acquired on a General Electric Signa 1.5T MRI scanner in the Necker-Enfants-Malades  
170 hospital (See SI Appendix, Table S2 and SI Methods for details). Due to the age of the babies,  
171 all of them received premedication before their MRI (pentobarbital, 7.5 mg/kg) to prevent  
172 motion artifacts. It has been shown that barbiturates do not have any influence on the  
173 regional distribution of CBF or on default mode resting state network (Werner 1995;  
174 Zilbovicius et al. 2000; Mishra 2002; Fransson et al. 2007; Doria et al. 2010).

175 **Data processing and treatment.** MRI images were pre-processed using Statistical Parametric  
176 Mapping (SPM8 software, Wellcome Department of Cognitive Neurology London  
177 [www.fil.ion.ucl.ac.uk/spm/software/spm8](http://www.fil.ion.ucl.ac.uk/spm/software/spm8)) implemented in Matlab (Mathworks Inc.,  
178 Sherborn, MA, USA) and analyzed using a voxel-based approach (See SI Appendix, SI  
179 Methods for details). Native 3D-T1-weighted images were segmented into gray matter,  
180 white matter and cerebrospinal fluid using the Infant Brain Probability Templates  
181 (<https://irc.cchmc.org/software/infant.php>). The unified segmentation enables spatial

182 normalization, tissue segmentation and bias correction within the same generative model  
183 (Ashburner and Friston 2005). A postprocessing visual quality control was performed by two  
184 independent investigators (PA and JMT) on the grey matter maps to ensure the quality of  
185 the segmentation. The ASL images were co-registered to the corresponding native gray  
186 matter images using a normalized mutual information cost function (separation: 4 and 2  
187 mm, tolerance: from 0.02 to 0.001, histogram smoothing: 7 x 7 mm). After visual inspection  
188 of the co-registration, the ASL images were then spatially normalized using the deformation  
189 matrices from the segmentation process. The resulting ASL images were smoothed using an  
190 isotropic Gaussian filter of 10 mm. ASL acquisition provides a high-quality image of  
191 quantitative CBF. Motion in ASL acquisition is mainly characterized by signal outside of the  
192 brain, often recognizable as signal from layers of skin or fat, that can be detected by on-the-  
193 fly expert visual analysis. Therefore, we performed a two steps quality control. The first one  
194 by an expert radiologist right after acquisition (NB) and the second one by an imaging  
195 processing expert engineer (HL) before pre-processing to discard images with artifacts such  
196 as motion, aliasing, ghosting, spikes, low signal to noise ratio.

197 **Image analysis.** We normalized rest CBF within the ASL images by the mean CBF measured  
198 within the basal ganglia to avoid major variations in rest CBF due to cardiac blood flow (Licht  
199 et al. 2004; Varela et al. 2012) and blood pressure labilities (Hardy et al. 1997). The basal  
200 ganglia was specifically chosen in our study as it is one of the earliest structures to matures  
201 (Chugani and Phelps 1986) and regression analyses did not show any age-related variations  
202 in the rest CBF of this region within our age range ( $\beta = 5.2 \times 10^{-4}$  unit/day,  $t_{(50)} = 0.045$ ,  $p =$   
203 0.96). The regional rest CBF was expressed as percentage of basal ganglia rest CBF and  
204 presented in arbitrary unit.

205 We then performed whole-brain voxel-wise analyses of the 52 images within the general  
206 linear model framework using SPM8. Age was entered as covariate in a multiple regression  
207 model. The analyses were constrained to gray matter tissue only by thresholding the analysis  
208 mask to 40% of the mean gray matter image of our sample.

209 We also extracted mean rest CBF from 92 regions of interest (hemispheres and regions)  
210 using the AAL parcellation toolbox (Tzourio-Mazoyer et al. 2002). We matched the AAL  
211 parcellation to our sample by spatially normalizing the MNI single subject MRI brain to the



212 Infant Brain Probability Templates. In addition, a further analysis was performed by selecting  
213 and merging regions of interested based on their relevance in term of development. We  
214 selected the hippocampus, the amygdala, the thalamus, the primary visual and auditory  
215 cortices, the insula, the superior temporal cortex. We formed the sensorimotor cortex by  
216 merging the precentral and postcentral regions, and the prefrontal cortex by merging the  
217 inferior, middle and superior frontal regions and the gyrus rectus. All analyses were  
218 performed using R version 3.6.1 (<http://cran.r-project.org>) and ggplot2 (3.2.1) and lme4 (1.1-  
219 21) packages. Age-related regressions were assessed using linear mixed models to account  
220 for the intra-subject left and right hemisphere measurements. Age, hemisphere and age-by-  
221 hemisphere interaction were entered as fixed effects and subject as nested random effect.  
222 We corrected for multiple comparisons using Bonferroni correction by multiplying the p  
223 values by the number of regions. Finally, we performed inter-regional correlation analyses of  
224 the rest CBF values to derive a Pearson's correlation coefficient for each pair of regions and  
225 to build an inter-regional correlation matrix. The ordering of the correlation matrix was  
226 based on correlations with the first principal component of the same matrix.

## 227 **Results**

228 The relative values of global rest CBF increased with age from 3 to 12 months in the right (b  
229 = 0.0010 unit/day,  $t_{(55,71)} = 6.64$ ,  $p = 1.36E-08$ ) and in the left hemisphere (b = 0.00078  
230 unit/day,  $t_{(55,71)} = 5.34$ ,  $p = 1.74E-06$ ) with a greater age-related increase in the right as  
231 compared to the left ( $p = 0,0074$ , see Figure 1 and Table 1).

232 <Table 1><Figure 1>

233 Qualitative analysis of the whole-brain voxel-wise maps showed a regionally heterogeneous  
234 age-related increase of the relative rest CBF values (see Figure 2 and SI Appendix, Movies S1  
235 to S4). The highest rest CBF at 3 months were observed within the sensorimotor and the  
236 primary visual cortices. The age-related increase in rest CBF progressed spatially from these  
237 regions. From the calcarine fissure, the rest CBF increased toward the visual associative  
238 regions up to the supramarginal and the precuneus regions. From the primary motor and  
239 sensory cortices, the rest CBF increased toward both the anterior and the posterior part of  
240 the brain. Anteriorly, through the anterior cingulate and the prefrontal cortices; posteriorly,  
241 through the insula and the superior temporal cortices. In contrast, the rest CBF was stable

242 within the thalamus, the amygdala and the hippocampus. Between 9 and 12 months, the  
243 rest CBF increase was predominantly seen in the temporal and the prefrontal cortices. The  
244 regional right over left rest CBF asymmetry remained present throughout the whole studied  
245 period.

246 <Figure 2>

247 Quantitative analysis within the predefined regions of interest showed different trajectories  
248 of local rest functional maturation (see Table 1 and Figure 1). First, in a subset of subcortical  
249 regions including the hippocampus (right:  $b = 0.00026$  unit/day,  $t_{(69,66)} = 1.76$ ,  $p = 0.74$ ; left:  $b$   
250  $= -0.00015$  unit/day,  $t_{(69,66)} = -1.01$ ,  $p = 1$ ), the amygdala (right:  $b = -0.00008$  unit/day,  $t_{(83,74)} =$   
251  $-0.60$ ,  $p = 1$ ; left:  $b = -0.00019$  unit/day,  $t_{(83,74)} = -1.36$ ,  $p = 1$ ) and the thalamus (right:  $b = -$   
252  $0.00030$  unit/day,  $t_{(65,29)} = -2.52$ ,  $p = 0,13$ ; left:  $b = -0.00044$  unit/day,  $t_{(65,29)} = -3.62$ ,  $p =$   
253  $0.0051$ ), the age-related rest CBF maturation through the first year of life remained stable  
254 indicating already matured regions at 3 months old. Second, the subset of cortical regions  
255 including the primary visual (right:  $b = 0.00094$  unit/day,  $t_{(60,07)} = 4.33$ ,  $p = 5.2E-04$ ; left:  $b =$   
256  $0.00028$  unit/day,  $t_{(60,07)} = 3.91$ ,  $p = 0.0021$ ) and primary auditory cortices (right:  $b = 0.00030$   
257 unit/day,  $t_{(73,77)} = 1.60$ ,  $p = 0.94$ ; left:  $b = 0.00028$  unit/day,  $t_{(73,77)} = 1.48$ ,  $p = 1$ ), the insula  
258 (right:  $b = 0.00043$  unit/day,  $t_{(84,2)} = 3.37$ ,  $p = 0.010$ , left:  $b = 0.00024$  unit/day,  $t_{(84,2)} = 1.86$ ,  $p$   
259  $= 0.59$ ) and the sensorimotor cortex (right:  $b = 0.00052$  unit/day,  $t_{(59,12)} = 2.50$ ,  $p = 0.14$ ; left:  
260  $b = 0.00025$  unit/day,  $t_{(59,12)} = 1.18$ ,  $p = 1$ ) presented a small age-related rest CBF increase  
261 indicating early maturational process. Third, a subset of cortical regions including the  
262 prefrontal (right:  $b = 0.00132$  unit/day,  $t_{(60,12)} = 6.80$ ,  $p = 4.86E-08$ ; left:  $b = 0.00118$  unit/day,  
263  $t_{(60,12)} = 6.10$ ,  $p = 7.36E-07$ ) and the superior temporal cortices (right:  $b = 0.00088$  unit/day,  
264  $t_{(63,74)} = 5.10$ ,  $p = 2.94E-05$ ; left:  $b = 0.00072$  unit/day,  $t_{(63,74)} = 4.18$ ,  $p = 8.03E-04$ ) presented a  
265 high age-related rest CBF increase indicating late maturational process. Faster right over left  
266 age-related rest CBF increase was more pronounced within the hippocampus ( $p = 0.014$ ).  
267 Finally, the rest CBF inter-regional correlation matrix between the predefined regions  
268 showed a cluster of highly correlated regions with the following rank order: Superior  
269 temporal, prefrontal, insula, sensorimotor and primary auditory cortices (see Figure 3).

270 <Figure 3>

271 The age-related rest CBF changes computed for the exhaustive list of 45 regions of interest  
272 are available in SI Appendix, Table S3.

### 273 **Discussion**

274 Our study shows for the first time the dynamics of local rest functional brain maturation  
275 throughout the first year of life using a non-invasive imaging method. Global rest CBF  
276 increased significantly from 3 to 12 months of age and this increase was more pronounced in  
277 the right than in the left hemisphere. Qualitative and quantitative analyses revealed marked  
278 regional differences in local functional brain maturation. Subcortical structures such as basal  
279 ganglia, thalamus, amygdala and hippocampus cortices are stable at 3 months. At the  
280 cortical level, we observed two different maturational trajectories: first, a set of regions with  
281 a low age-related rest CBF increase between 3 to 12 months, including the primary  
282 auditory/visual cortices, the sensorimotor cortex and the insula. A second set of regions a  
283 high age-related increase rest CBF increase between 3 to 12 months, including the superior  
284 temporal and prefrontal cortices.

285 The increase in global rest CBF from 3 to 12 months of age that we describe here is  
286 consistent with pioneers PET and SPECT studies showing increase in rest metabolism and  
287 CBF during the same period (Chugani et al. 1987; Chiron et al. 1992). Furthermore, we  
288 highlighted a hemispheric functional maturational asymmetry, with greater right than left  
289 global rest CBF increase during the first year. This agrees with previous studies that showed  
290 greater right than left rest CBF for these regions at birth (Lin et al. 2013) and from 1 year to 3  
291 years old (Chiron et al. 1997), supporting the hypothesis that the right hemisphere  
292 functionally matures earlier than the left.

293 Globally, our findings are in accordance with results from prior research based on histology,  
294 structural and rest functional brain imaging that has revealed distinct maturation trajectories  
295 of cortical regions and brain networks over the first year of life (Chugani and Phelps 1986;  
296 Gilmore et al. 2012; Smyser and Neil 2015; Zhang et al. 2019). Firstly, at the histological  
297 level, post-mortem data showed that the time course of synaptogenesis differs across  
298 cortical regions. Indeed, a burst of synapse formation occurs between 3 and 4 months within  
299 primary visual, auditory cortices somatosensory cortices, which appeared already mature at  
300 3 months of life (Marin-Padilla 1970; Huttenlocher 1979, 1990; Michel and Garey 1984). In

301 non-human primates, Rakic and colleagues have shown a synchronic synaptogenesis in the  
302 visual, somatosensory, motor, and prefrontal areas (Rakic et al. 1986). In humans,  
303 synaptogenesis in the prefrontal cortex begins about the same time as in visual cortex, but it  
304 does not reach its peak period until age 8 months, continuing thereafter through the second  
305 year of life (Kostovic et al. 1995; Huttenlocher and Dabholkar 1997). Using quantitative  
306 electron microscopy in non-human primates, this remarkable overproduction followed by  
307 elimination of synapses in the prefrontal cortex have also been described (Bourgeois et al.  
308 1994). These congruent findings strengthen our results as synaptic density is coupled to rest  
309 CBF. Secondly, concerning myelination, microstructural MRI maturational studies described  
310 a global maturation pattern characterized by early maturation of the sensorimotor cortex,  
311 followed by the other sensory cortices and then the associative cortices, including the  
312 prefrontal cortex (Dubois et al. 2008; Deoni et al. 2011). Finally, recent data obtained with  
313 resting-state functional MRI studies allowed to describe maturational changes of functional  
314 networks during the first year of life (Smyser et al. 2010; Gao et al. 2015; Smyser and Neil  
315 2015; Wen et al. 2019). Especially, Gao et al. have described a maturation sequence starting  
316 with primary sensorimotor/auditory and visual then attention/default-mode, and finally  
317 executive control, prefrontal, networks (Gao et al. 2015). These different sequences of  
318 functional network maturation fit with and complement our results. Therefore, data coming  
319 from our study and previous rs-fMRI studies contribute to map a timetable of functional  
320 brain maturation during the first year of life.

321 Importantly, the spatial resolution of the ASL images allowed an accurate mapping of the  
322 age-related rest CBF changes. Consequently, we were able to describe insular local  
323 functional maturational evolution, which reaches its one-year pattern rather early, during  
324 the first months of life. A well-established literature and recently anatomical and resting-  
325 state functional MRI studies describe early human cortical development in areas close to the  
326 insula and radiating outward (Alcauter et al. 2015). This early insular maturation fits with its  
327 role in the integration of interoceptive stimuli, such as coolness, warmth and distension of  
328 the bladder, stomach or rectum (Craig 2009), but also in the integration of external stimuli,  
329 notably pain (Mazzola et al. 2009). In addition, it is highly pertinent, since the insula is a key  
330 structure for the baby's development and essential to baby's survival.

331 The spatial resolution improvement also allowed us to describe for the first time a  
332 remarkably synchronous increase in rest CBF between the prefrontal and superior temporal  
333 cortices (see Figure 3), both main components of the called “social brain” (Brothers et al.  
334 1990). The late maturation of the prefrontal cortex had been previously described by  
335 structural and functional brain imaging studies (Chugani and Phelps 1986; Gilmore et al.  
336 2012). Noticeably, we describe here a late maturation within the posterior temporal regions  
337 during the first year of life, particularly within the posterior superior temporal sulcus, a  
338 region known to be highly implicated in social cognition (Zilbovicius et al. 2006).  
339 Interestingly, the late and synchronous maturation of these two cortical structures  
340 corresponds to the remarkable development of the baby’s social skills through the first year  
341 of life.

342 To the best of our knowledge, only 2 studies using ASL imaging have focused on brain  
343 development during the first year of life, but a comparison with our results is limited due to  
344 important differences in their methodological approaches. Duncan et al. studied a sample of  
345 61 infants within a very narrow age-range from 3 to 5 months (Duncan et al. 2014). Their  
346 main results describing a significantly greater rest CBF in the sensorimotor and occipital  
347 regions compared with the dorsolateral prefrontal in this age-range are in accordance with  
348 our results. In the second study, combining region of interest (ROI) and whole-brain analyses  
349 on rest CBF, Wang et al. investigated a group of 8 7-month-old infants to a group of 8 13-  
350 month-old infants (Wang et al. 2008). Although they showed rest CBF increase in the 13-  
351 month-old group compared to the 7-month-old group mainly located in the frontal lobe,  
352 they did not examine directly the age-related rest CBF slopes.

353 This study has some limitations. First, we used a linear model for data analysis. Although  
354 cubic and quadratic fitting models did not improve our statistical models, it is improbable  
355 that a linear model exactly fits functional cortical maturation. This issue can be addressed in  
356 future studies by adding more and older subjects to further investigate the postnatal brain  
357 rest functional maturation trajectory. Second, due to their age, all infants received light  
358 premedication before the MRI to prevent motion artifacts, and all the scans were acquired  
359 during sleep. No significant influence neither on the regional distribution of CBF (Fransson et  
360 al. 2007; Doria et al. 2010; Carsin-Vu et al. 2018) nor in the default-mode network  
361 connectivity (Greicius et al. 2008) has been reported to this premedication. Third, it is

362 important to stress that CBF is an indirect surrogate marker of focal neural activity by  
363 providing two important metabolic substrate, oxygen and glucose, that are critically  
364 important to neurons, synapses and astrocytes. Although, this neuro-hemodynamic coupling  
365 plays an important role in brain development through dendritic sprouting, axonal growth,  
366 synapse formation and vascular patterning, it does not necessarily imply a maturity of the  
367 resulting neural activity. Finally, our study was performed in a clinical pediatric population.  
368 To ensure that it could be comparable with a non-clinical population, we discarded all clinical  
369 indications for MRI that could affect brain anatomy, function and further  
370 neurodevelopmental disorders. In addition, all scans were strictly normal, and follow-up  
371 confirmed a normal psychomotor development.

372 Defining typical trajectories of brain maturation provides references for a better  
373 understanding of neurodevelopmental disorders and preterm effects on further brain  
374 maturation. Because CBF reflects regional changes in synaptic density, ASL offers a  
375 noninvasive approach to studying local brain function. Furthermore, the recent possibility to  
376 implement ASL perfusion-based functional connectivity in conjunction to regular resting  
377 state BOLD connectivity should be investigated for characterizing spatiotemporal and  
378 quantitative properties of cerebral networks during brain maturation (Chen et al. 2015). In  
379 conclusion, to our knowledge, our study is the first to describe and characterize dynamics  
380 local functional brain maturation during the first year of life and provide insight into an  
381 important and vulnerable neurodevelopmental period.

## 382 **Notes**

383 The authors declare no competing interests. The data that support the findings of this study  
384 are available on request from the corresponding author. The data are not publicly available  
385 due to them containing information that could compromise research participant consent.

## 386 **Corresponding author:**

387 Hervé Lemaître, PhD ([herve.lemaitre@u-bordeaux.fr](mailto:herve.lemaitre@u-bordeaux.fr)), Groupe d'Imagerie  
388 Neurofonctionnelle, Institut des Maladies Neurodégénératives (CNRS UMR 5293), Université  
389 de bordeaux, Centre Broca Nouvelle-Aquitaine, 146 rue Léo Saignat - CS 61292 - Case 28,  
390 33076 Bordeaux cedex, France



392 **References**

- 393 Alcauter S, Lin W, Keith Smith J, Gilmore JH, Gao W. 2015. Consistent anterior-posterior segregation  
394 of the insula during the first 2 years of life. *Cereb Cortex*. 25:1176–1187.
- 395 Allievi AG, Arichi T, Tusor N, Kimpton J, Arulkumaran S, Counsell SJ, Edwards AD, Burdet E. 2016.  
396 Maturation of Sensori-Motor Functional Responses in the Preterm Brain. *Cereb Cortex*.  
397 26:402–413.
- 398 Anderson AW, Marois R, Colson ER, Peterson BS, Duncan CC, Ehrenkranz RA, Schneider KC, Gore JC,  
399 Ment LR. 2001. Neonatal auditory activation detected by functional magnetic resonance  
400 imaging. *Magn Reson Imaging*. 19:1–5.
- 401 Arichi T, Gordon-Williams R, Allievi A, Groves AM, Burdet E, Edwards AD. 2013. Computer-controlled  
402 stimulation for functional magnetic resonance imaging studies of the neonatal olfactory  
403 system. *Acta Paediatr*. 102:868–875.
- 404 Arichi T, Moraux A, Melendez A, Doria V, Groppo M, Merchant N, Combs S, Burdet E, Larkman DJ,  
405 Counsell SJ, Beckmann CF, Edwards AD. 2010. Somatosensory cortical activation identified by  
406 functional MRI in preterm and term infants. *Neuroimage*. 49:2063–2071.
- 407 Ashburner J, Friston KJ. 2005. Unified segmentation. *Neuroimage*. 26:839–851.
- 408 Ball G, Aljabar P, Zebari S, Tusor N, Arichi T, Merchant N, Robinson EC, Ogundipe E, Rueckert D,  
409 Edwards AD, Counsell SJ. 2014. Rich-club organization of the newborn human brain. *Proc*  
410 *Natl Acad Sci U S A*. 111:7456–7461.
- 411 Biagi L, Abbruzzese A, Bianchi MC, Alsop DC, Del Guerra A, Tosetti M. 2007. Age dependence of  
412 cerebral perfusion assessed by magnetic resonance continuous arterial spin labeling. *J Magn*  
413 *Reson Imaging*. 25:696–702.
- 414 Bourgeois JP, Goldman-Rakic PS, Rakic P. 1994. Synaptogenesis in the prefrontal cortex of rhesus  
415 monkeys. *Cerebral Cortex (New York, NY: 1991)*. 4:78–96.
- 416 Brothers L, Ring B, Kling A. 1990. Response of neurons in the macaque amygdala to complex social  
417 stimuli. *Behav Brain Res*. 41:199–213.
- 418 Carsin-Vu A, Corouge I, Commowick O, Bouzille G, Barillot C, Ferre JC, Proisy M. 2018. Measurement  
419 of pediatric regional cerebral blood flow from 6 months to 15 years of age in a clinical  
420 population. *Eur J Radiol*. 101:38–44.
- 421 Chen JJ, Jann K, Wang DJ. 2015. Characterizing Resting-State Brain Function Using Arterial Spin  
422 Labeling. *Brain Connect*. 5:527–542.
- 423 Chiron C, Jambaque I, Nabbout R, Lounes R, Syrota A, Dulac O. 1997. The right brain hemisphere is  
424 dominant in human infants. *Brain*. 120 ( Pt 6):1057–1065.
- 425 Chiron C, Raynaud C, Mazière B, Zilbovicius M, Laflamme L, Masure MC, Dulac O, Bourguignon M,  
426 Syrota A. 1992. Changes in regional cerebral blood flow during brain maturation in children  
427 and adolescents. *J Nucl Med*. 33:696–703.
- 428 Chugani HT, Phelps ME. 1986. Maturation changes in cerebral function in infants determined by  
429 18FDG positron emission tomography. *Science*. 231:840–843.
- 430 Chugani HT, Phelps ME, Mazziotta JC. 1987. Positron emission tomography study of human brain  
431 functional development. *Ann Neurol*. 22:487–497.
- 432 Craig ADB. 2009. How do you feel--now? The anterior insula and human awareness. *Nat Rev*  
433 *Neurosci*. 10:59–70.
- 434 Dehaene-Lambertz G, Hertz-Pannier L, Dubois J, Meriaux S, Roche A, Sigman M, Dehaene S. 2006.  
435 Functional organization of perisylvian activation during presentation of sentences in  
436 preverbal infants. *Proc Natl Acad Sci U S A*. 103:14240–14245.
- 437 Deoni SCL, Mercure E, Blasi A, Gasston D, Thomson A, Johnson M, Williams SCR, Murphy DGM. 2011.  
438 Mapping infant brain myelination with magnetic resonance imaging. *J Neurosci*. 31:784–791.
- 439 Detre JA, Alsop DC. 1999. Perfusion magnetic resonance imaging with continuous arterial spin  
440 labeling: methods and clinical applications in the central nervous system. *Eur J Radiol*.  
441 30:115–124.



- 442 Detre JA, Wang J, Wang Z, Rao H. 2009. Arterial spin-labeled perfusion MRI in basic and clinical  
443 neuroscience. *Curr Opin Neurol.* 22:348–355.
- 444 Doria V, Beckmann CF, Arichi T, Merchant N, Groppo M, Turkheimer FE, Counsell SJ, Murgasova M,  
445 Aljabar P, Nunes RG, Larkman DJ, Rees G, Edwards AD. 2010. Emergence of resting state  
446 networks in the preterm human brain. *Proc Natl Acad Sci U S A.* 107:20015–20020.
- 447 Dubois J, Dehaene-Lambertz G, Kulikova S, Poupon C, Huppi PS, Hertz-Pannier L. 2014. The early  
448 development of brain white matter: a review of imaging studies in fetuses, newborns and  
449 infants. *Neuroscience.* 276:48–71.
- 450 Dubois J, Dehaene-Lambertz G, Soares C, Cointepas Y, Le Bihan D, Hertz-Pannier L. 2008.  
451 Microstructural correlates of infant functional development: example of the visual pathways.  
452 *J Neurosci.* 28:1943–1948.
- 453 Duncan AF, Caprihan A, Montague EQ, Lowe J, Schrader R, Phillips JP. 2014. Regional cerebral blood  
454 flow in children from 3 to 5 months of age. *AJNR Am J Neuroradiol.* 35:593–598.
- 455 Erberich SG, Panigrahy A, Friedlich P, Seri I, Nelson MD, Gilles F. 2006. Somatosensory lateralization  
456 in the newborn brain. *Neuroimage.* 29:155–161.
- 457 Fransson P, Aden U, Blennow M, Lagercrantz H. 2011. The functional architecture of the infant brain  
458 as revealed by resting-state fMRI. *Cereb Cortex.* 21:145–154.
- 459 Fransson P, Skiold B, Horsch S, Nordell A, Blennow M, Lagercrantz H, Aden U. 2007. Resting-state  
460 networks in the infant brain. *Proc Natl Acad Sci U S A.* 104:15531–15536.
- 461 Gao W, Alcauter S, Elton A, Hernandez-Castillo CR, Smith JK, Ramirez J, Lin W. 2015. Functional  
462 Network Development During the First Year: Relative Sequence and Socioeconomic  
463 Correlations. *Cereb Cortex.* 25:2919–2928.
- 464 Gao W, Gilmore JH, Giovanello KS, Smith JK, Shen D, Zhu H, Lin W. 2011. Temporal and spatial  
465 evolution of brain network topology during the first two years of life. *PLoS One.* 6:e25278.
- 466 Gao W, Gilmore JH, Shen D, Smith JK, Zhu H, Lin W. 2013. The synchronization within and interaction  
467 between the default and dorsal attention networks in early infancy. *Cereb Cortex.* 23:594–  
468 603.
- 469 Gilmore JH, Lin W, Prastawa MW, Looney CB, Vetsa YS, Knickmeyer RC, Evans DD, Smith JK, Hamer  
470 RM, Lieberman JA, Gerig G. 2007. Regional gray matter growth, sexual dimorphism, and  
471 cerebral asymmetry in the neonatal brain. *J Neurosci.* 27:1255–1260.
- 472 Gilmore JH, Shi F, Woolson SL, Knickmeyer RC, Short SJ, Lin W, Zhu H, Hamer RM, Styner M, Shen D.  
473 2012. Longitudinal development of cortical and subcortical gray matter from birth to 2 years.  
474 *Cereb Cortex.* 22:2478–2485.
- 475 Goldman-Rakic PS. 1987. Development of cortical circuitry and cognitive function. *Child Dev.* 58:601–  
476 622.
- 477 Greicius MD, Kiviniemi V, Tervonen O, Vainionpaa V, Alahuhta S, Reiss AL, Menon V. 2008. Persistent  
478 default-mode network connectivity during light sedation. *Hum Brain Mapp.* 29:839–847.
- 479 Hardy P, Varma DR, Chemtob S. 1997. Control of cerebral and ocular blood flow autoregulation in  
480 neonates. *Pediatr Clin North Am.* 44:137–152.
- 481 Huttenlocher PR. 1979. Synaptic density in human frontal cortex - developmental changes and  
482 effects of aging. *Brain Res.* 163:195–205.
- 483 Huttenlocher PR. 1990. Morphometric study of human cerebral cortex development.  
484 *Neuropsychologia.* 28:517–527.
- 485 Huttenlocher PR, Dabholkar AS. 1997. Regional differences in synaptogenesis in human cerebral  
486 cortex. *J Comp Neurol.* 387:167–178.
- 487 Innocenti GM, Price DJ. 2005. Exuberance in the development of cortical networks. *Nat Rev Neurosci.*  
488 6:955–965.
- 489 Kagan J, Herschkowitz N. 2005. A young mind in a growing brain, A young mind in a growing brain.  
490 Mahwah, NJ, US: Lawrence Erlbaum Associates Publishers.
- 491 Knickmeyer RC, Gouttard S, Kang C, Evans D, Wilber K, Smith JK, Hamer RM, Lin W, Gerig G, Gilmore  
492 JH. 2008. A structural MRI study of human brain development from birth to 2 years. *J*  
493 *Neurosci.* 28:12176–12182.

- 494 Kostovic I, Judas M, Petanjek Z, Simic G. 1995. Ontogenesis of goal-directed behavior: anatomo-  
495 functional considerations. *Int J Psychophysiol.* 19:85–102.
- 496 Kostovic I, Judas M, Rados M, Hrabac P. 2002. Laminar organization of the human fetal cerebrum  
497 revealed by histochemical markers and magnetic resonance imaging. *Cereb Cortex.* 12:536–  
498 544.
- 499 Leenders KL, Perani D, Lammertsma AA, Heather JD, Buckingham P, Healy MJ, Gibbs JM, Wise RJ,  
500 Hatazawa J, Herold S, et al. 1990. Cerebral blood flow, blood volume and oxygen utilization.  
501 Normal values and effect of age. *Brain.* 113 ( Pt 1):27–47.
- 502 Li G, Wang L, Shi F, Lyall AE, Lin W, Gilmore JH, Shen D. 2014. Mapping longitudinal development of  
503 local cortical gyrification in infants from birth to 2 years of age. *J Neurosci.* 34:4228–4238.
- 504 Licht DJ, Wang J, Silvestre DW, Nicolson SC, Montenegro LM, Wernovsky G, Tabbutt S, Durning SM,  
505 Shera DM, Gaynor JW, Spray TL, Clancy RR, Zimmerman RA, Detre JA. 2004. Preoperative  
506 cerebral blood flow is diminished in neonates with severe congenital heart defects. *J Thorac*  
507 *Cardiovasc Surg.* 128:841–849.
- 508 Lin PY, Roche-Labarbe N, Dehaes M, Fenoglio A, Grant PE, Franceschini MA. 2013. Regional and  
509 hemispheric asymmetries of cerebral hemodynamic and oxygen metabolism in newborns.  
510 *Cereb Cortex.* 23:339–348.
- 511 Lyall AE, Shi F, Geng X, Woolson S, Li G, Wang L, Hamer RM, Shen D, Gilmore JH. 2015. Dynamic  
512 Development of Regional Cortical Thickness and Surface Area in Early Childhood. *Cereb*  
513 *Cortex.* 25:2204–2212.
- 514 Marin-Padilla M. 1970. Prenatal and early postnatal ontogenesis of the human motor cortex: a golgi  
515 study. I. The sequential development of the cortical layers. *Brain Res.* 23:167–183.
- 516 Mazzola L, Isnard J, Peyron R, Guénot M, Mauguière F. 2009. Somatotopic organization of pain  
517 responses to direct electrical stimulation of the human insular cortex. *Pain.* 146:99–104.
- 518 Meng Y, Li G, Lin W, Gilmore JH, Shen D. 2014. Spatial distribution and longitudinal development of  
519 deep cortical sulcal landmarks in infants. *Neuroimage.* 100:206–218.
- 520 Michel AE, Garey LJ. 1984. The development of dendritic spines in the human visual cortex. *Hum*  
521 *Neurobiol.* 3:223–227.
- 522 Mishra LD. 2002. Cerebral blood flow and anaesthesia: a review. *Indian Journal of Anaesthesia.*  
523 46:87–95.
- 524 Nie J, Li G, Wang L, Shi F, Lin W, Gilmore JH, Shen D. 2014. Longitudinal development of cortical  
525 thickness, folding, and fiber density networks in the first 2 years of life. *Hum Brain Mapp.*  
526 35:3726–3737.
- 527 Paniukov D, Lebel RM, Giesbrecht G, Lebel C. 2020. Cerebral blood flow increases across early  
528 childhood. *Neuroimage.* 204:116224.
- 529 Partridge SC, Mukherjee P, Henry RG, Miller SP, Berman JI, Jin H, Lu Y, Glenn OA, Ferriero DM,  
530 Barkovich AJ, Vigneron DB. 2004. Diffusion tensor imaging: serial quantitation of white  
531 matter tract maturity in premature newborns. *Neuroimage.* 22:1302–1314.
- 532 Petanjek Z, Judas M, Simic G, Rasin MR, Uylings HB, Rakic P, Kostovic I. 2011. Extraordinary neoteny  
533 of synaptic spines in the human prefrontal cortex. *Proc Natl Acad Sci U S A.* 108:13281–  
534 13286.
- 535 Rakic P, Bourgeois JP, Eckenhoff MF, Zecevic N, Goldman-Rakic PS. 1986. Concurrent overproduction  
536 of synapses in diverse regions of the primate cerebral cortex. *Science (New York, NY).*  
537 232:232–235.
- 538 Shaw P, Kabani NJ, Lerch JP, Eckstrand K, Lenroot R, Gogtay N, Greenstein D, Clasen L, Evans A,  
539 Rapoport JL, Giedd JN, Wise SP. 2008. Neurodevelopmental trajectories of the human  
540 cerebral cortex. *J Neurosci.* 28:3586–3594.
- 541 Smyser CD, Inder TE, Shimony JS, Hill JE, Degnan AJ, Snyder AZ, Neil JJ. 2010. Longitudinal analysis of  
542 neural network development in preterm infants. *Cereb Cortex.* 20:2852–2862.
- 543 Smyser CD, Neil JJ. 2015. Use of resting-state functional MRI to study brain development and injury in  
544 neonates. *Semin Perinatol.* 39:130–140.

- 545 Sowell ER, Thompson PM, Leonard CM, Welcome SE, Kan E, Toga AW. 2004. Longitudinal mapping of  
546 cortical thickness and brain growth in normal children. *J Neurosci.* 24:8223–8231.
- 547 Tzourio-Mazoyer N, Landeau B, Papathanassiou D, Crivello F, Etard O, Delcroix N, Mazoyer B, Joliot  
548 M. 2002. Automated anatomical labeling of activations in SPM using a macroscopic  
549 anatomical parcellation of the MNI MRI single-subject brain. *Neuroimage.* 15:273–289.
- 550 van den Heuvel MP, Kersbergen KJ, de Reus MA, Keunen K, Kahn RS, Groenendaal F, de Vries LS,  
551 Benders MJ. 2015. The Neonatal Connectome During Preterm Brain Development. *Cereb  
552 Cortex.* 25:3000–3013.
- 553 Varela M, Groves AM, Arichi T, Hajnal JV. 2012. Mean cerebral blood flow measurements using phase  
554 contrast MRI in the first year of life. *NMR Biomed.* 25:1063–1072.
- 555 Wang Z, Fernandez-Seara M, Alsop DC, Liu WC, Flax JF, Benasich AA, Detre JA. 2008. Assessment of  
556 functional development in normal infant brain using arterial spin labeled perfusion MRI.  
557 *Neuroimage.* 39:973–978.
- 558 Webster MJ, Elashoff M, Weickert CS. 2011. Molecular evidence that cortical synaptic growth  
559 predominates during the first decade of life in humans. *Int J Dev Neurosci.* 29:225–236.
- 560 Wen X, Zhang H, Li G, Liu M, Yin W, Lin W, Zhang J, Shen D. 2019. First-year development of modules  
561 and hubs in infant brain functional networks. *Neuroimage.* 185:222–235.
- 562 Werner C. 1995. [Effects of analgesia and sedation on cerebrovascular circulation, cerebral blood  
563 volume, cerebral metabolism and intracranial pressure]. *Anaesthesist.* 44 Suppl 3:S566-572.
- 564 Williams DS, Detre JA, Leigh JS, Koretsky AP. 1992. Magnetic resonance imaging of perfusion using  
565 spin inversion of arterial water. *Proc Natl Acad Sci U S A.* 89:212–216.
- 566 Zhang H, Shen D, Lin W. 2019. Resting-state functional MRI studies on infant brains: A decade of gap-  
567 filling efforts. *Neuroimage.* 185:664–684.
- 568 Zilbovicius M, Boddaert N, Belin P, Poline JB, Remy P, Mangin JF, Thivard L, Barthelemy C, Samson Y.  
569 2000. Temporal lobe dysfunction in childhood autism: a PET study. *Positron emission  
570 tomography.* *Am J Psychiatry.* 157:1988–1993.
- 571 Zilbovicius M, Meresse I, Chabane N, Brunelle F, Samson Y, Boddaert N. 2006. Autism, the superior  
572 temporal sulcus and social perception. *Trends Neurosci.* 29:359–366.
- 573

Table 1: Age-related changes of the rest CBF values between 3 and 12 months of age.

|                                  | Hemisphere | estimate<br>(unit/day) | 95 % Confidence<br>Interval | t(degree of freedom) = t-<br>value | p-value<br>(age) | p-value (age x<br>hemisphere) |
|----------------------------------|------------|------------------------|-----------------------------|------------------------------------|------------------|-------------------------------|
| <b>Whole brain</b>               | Right      | 0.0010                 | [6.87e-04, 1.26e-02]        | t(55.71) = 6.64                    | 1.36E-08         | 0.0074                        |
|                                  | Left       | 0.00078                | [4.97e-04, 1.07e-02]        | t(55.71) = 5.34                    | 1.74E-06         |                               |
| <b>Hippocampus†</b>              | Right      | 0.00026                | [-2.75, 5.46E-04]           | t(69.66) = 1.76                    | 0.74             | 0.014                         |
|                                  | Left       | -0.00015               | [-4.35E-04, 1.38E-04]       | t(69.66) = -1.01                   | 1                |                               |
| <b>Amygdala†</b>                 | Right      | -0.00008               | [-3.55E-04, 1.86E-04]       | t(83.74) = -0.60                   | 1                | 1                             |
|                                  | Left       | -0.00019               | [-4.60E-04, 8.11]           | t(83.74) = -1.36                   | 1                |                               |
| <b>Thalamus†</b>                 | Right      | -0.00030               | [-5.36E-04, -6.79]          | t(65.29) = -2.52                   | 0.13             | 1                             |
|                                  | Left       | -0.00044               | [-6.69E-04, -2.01E-04]      | t(65.29) = -3.62                   | 0.0051           |                               |
| <b>Primary visual cortex†</b>    | Right      | 0.00094                | [5.17E-04, 1.37E-03]        | t(60.07) = 4.33                    | 5.2E-04          | 1                             |
|                                  | Left       | 0.00085                | [4.26E-04, 1.28E-03]        | t(60.07) = 3.91                    | 0.0021           |                               |
| <b>Primary auditory cortex†</b>  | Right      | 0.00030                | [-6.59, 6.72E-04]           | t(73.77) = 1.60                    | 1                | 1                             |
|                                  | Left       | 0.00028                | [-8.89, 6.49E-04]           | t(73.77) = 1.48                    | 1                |                               |
| <b>Insula†</b>                   | Right      | 0.00043                | [1.84E-04, 6.85E-04]        | t(84.2) = 3.37                     | 0.010            | 1                             |
|                                  | Left       | 0.00024                | [-1.08, 4.90E-04]           | t(84.2) = 1.86                     | 0.59             |                               |
| <b>Sensorimotor cortex†</b>      | Right      | 0.00052                | [1.13E-04, 9.22E-04]        | t(59.12) = 2.50                    | 0.14             | 0.25                          |
|                                  | Left       | 0.00025                | [-1.59E-04, 6.49E-04]       | t(59.12) = 1.18                    | 1                |                               |
| <b>Prefrontal cortex†</b>        | Right      | 0.00132                | [9.38E-04, 1.69E-03]        | t(60.12) = 6.80                    | 4.86E-08         | 1                             |
|                                  | Left       | 0.00118                | [8,03E-04, 1.56E-03]        | t(60.12) = 6.10                    | 7.36E-07         |                               |
| <b>Superior Temporal cortex†</b> | Right      | 0.00088                | [5.43E-04, 1.21E-03]        | t(63.74) = 5.10                    | 2.94E-05         | 1                             |
|                                  | Left       | 0.00072                | [3.85E-04, 1.06E-03]        | t(63.74) = 4.18                    | 8.03E-04         |                               |

†: p- values Bonferroni corrected for the number of sub-parts of the brain. rest CBF values are normalized by the rest CBF measured within the basal ganglia and presented in arbitrary unit.

575 **Figure 1:** Age-related changes of the rest CBF values in predefined regions of interest  
576 between 3 and 12 months of age. The whole brain in red, subset of stable subcortical regions  
577 (hippocampus, amygdala and thalamus) in purple, subset of early maturing cortical regions  
578 (primary visual and auditory cortices, insula and sensorimotor cortex) in green, subset of late  
579 maturing cortical regions (prefrontal and superior temporal cortices) in blue. Each dot  
580 represents a subject, and each line represents the estimated regression based on a linear  
581 model for the left (empty dots and dashed line) and right (filled dots and solid line)  
582 hemispheres. The rest CBF values are normalized by the rest CBF measured within the basal  
583 ganglia and presented in arbitrary unit.

584 **Figure 2:** rest CBF values at 3, 6, 9 and 12 months of age displayed on the medial and lateral  
585 view of the left and right hemispheres. The rest CBF values are normalized by the rest CBF  
586 measured within the basal ganglia and presented in arbitrary unit. Surface rendering was  
587 done using mri\_vol2surf from freesurfer (<https://surfer.nmr.mgh.harvard.edu/>).

588 **Figure 3:** Correlogram of the correlation matrix for the rest CBF values in the predefined  
589 regions of interest. Size and color of the circle represent the Pearson's correlation  
590 coefficients. Correlation ordering is based on correlations with the first principal components  
591 of the same matrix (i.e. similarity measure).

592

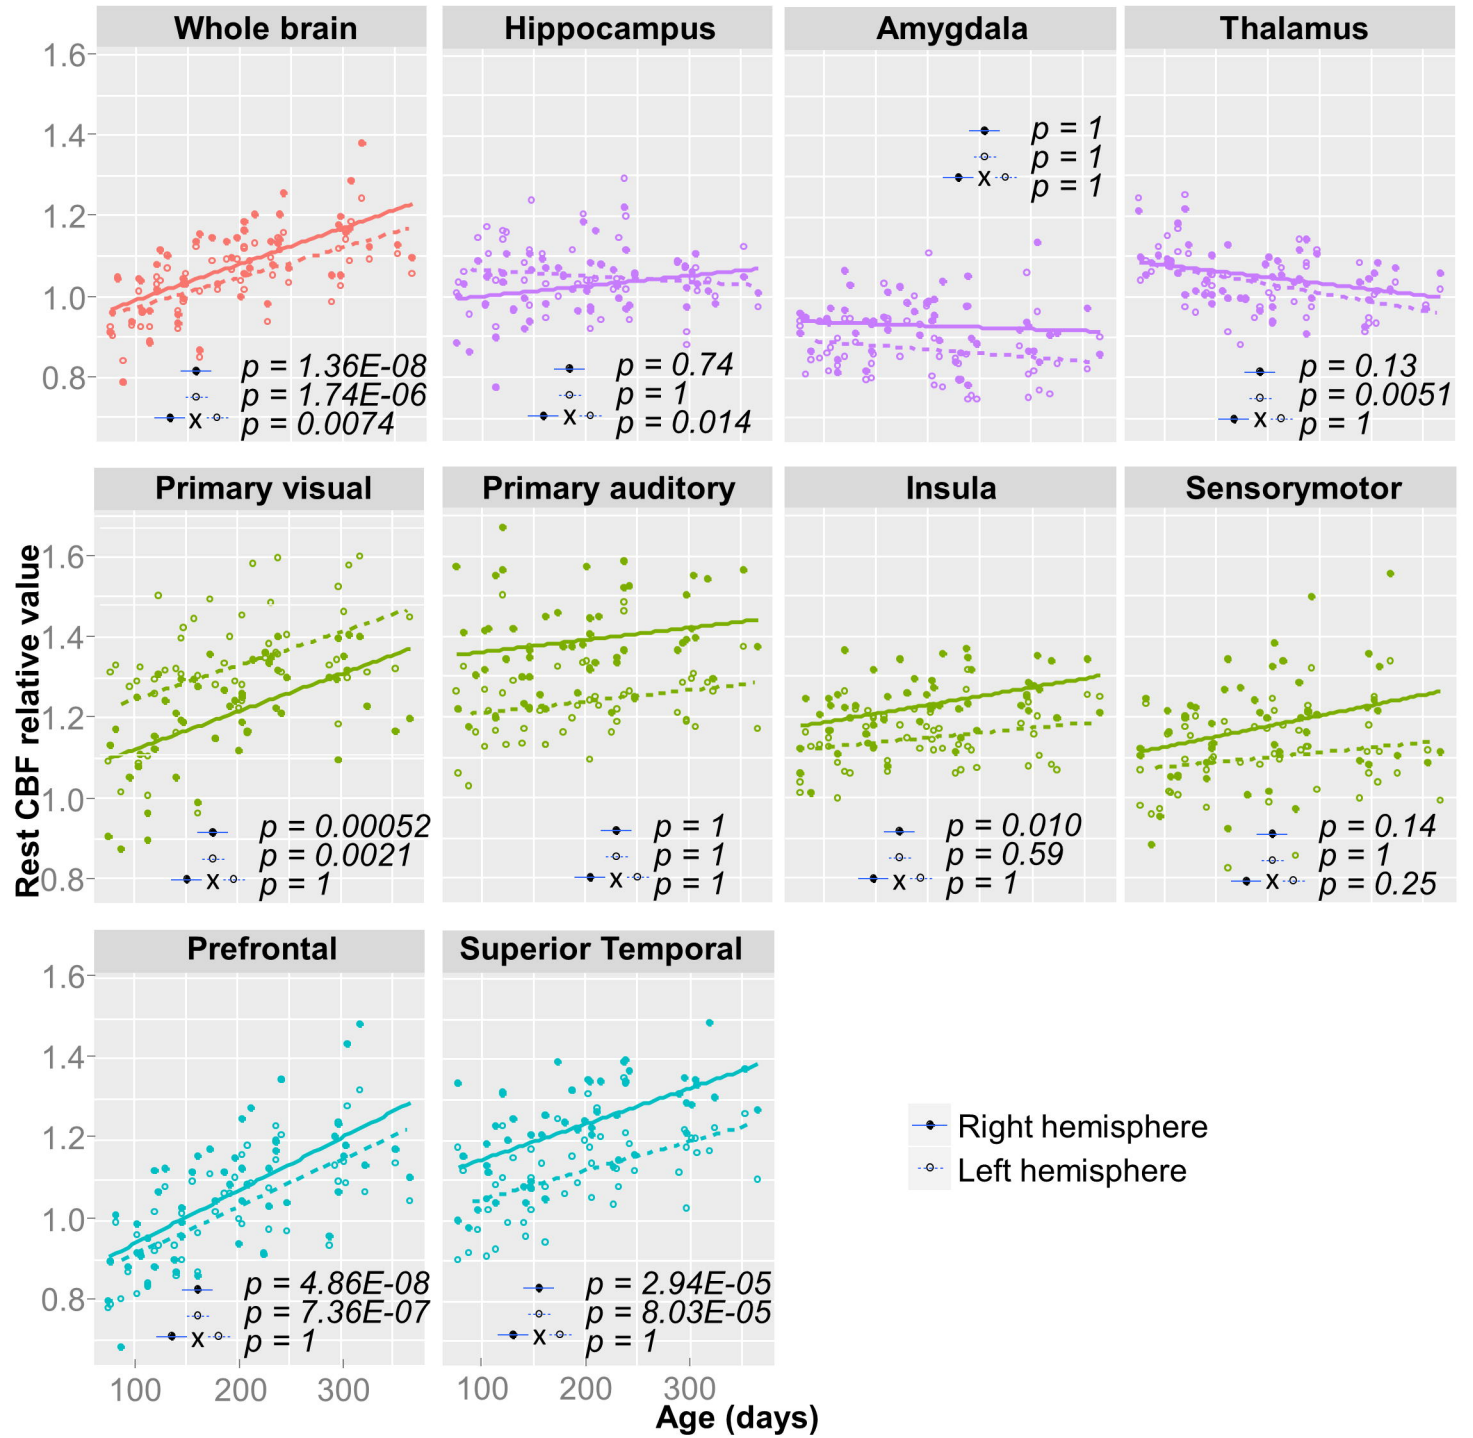



**Left**

**Right**

3

6

9

12

**Age (months)**

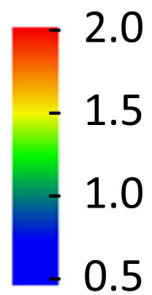

Rest CBF  
relative value

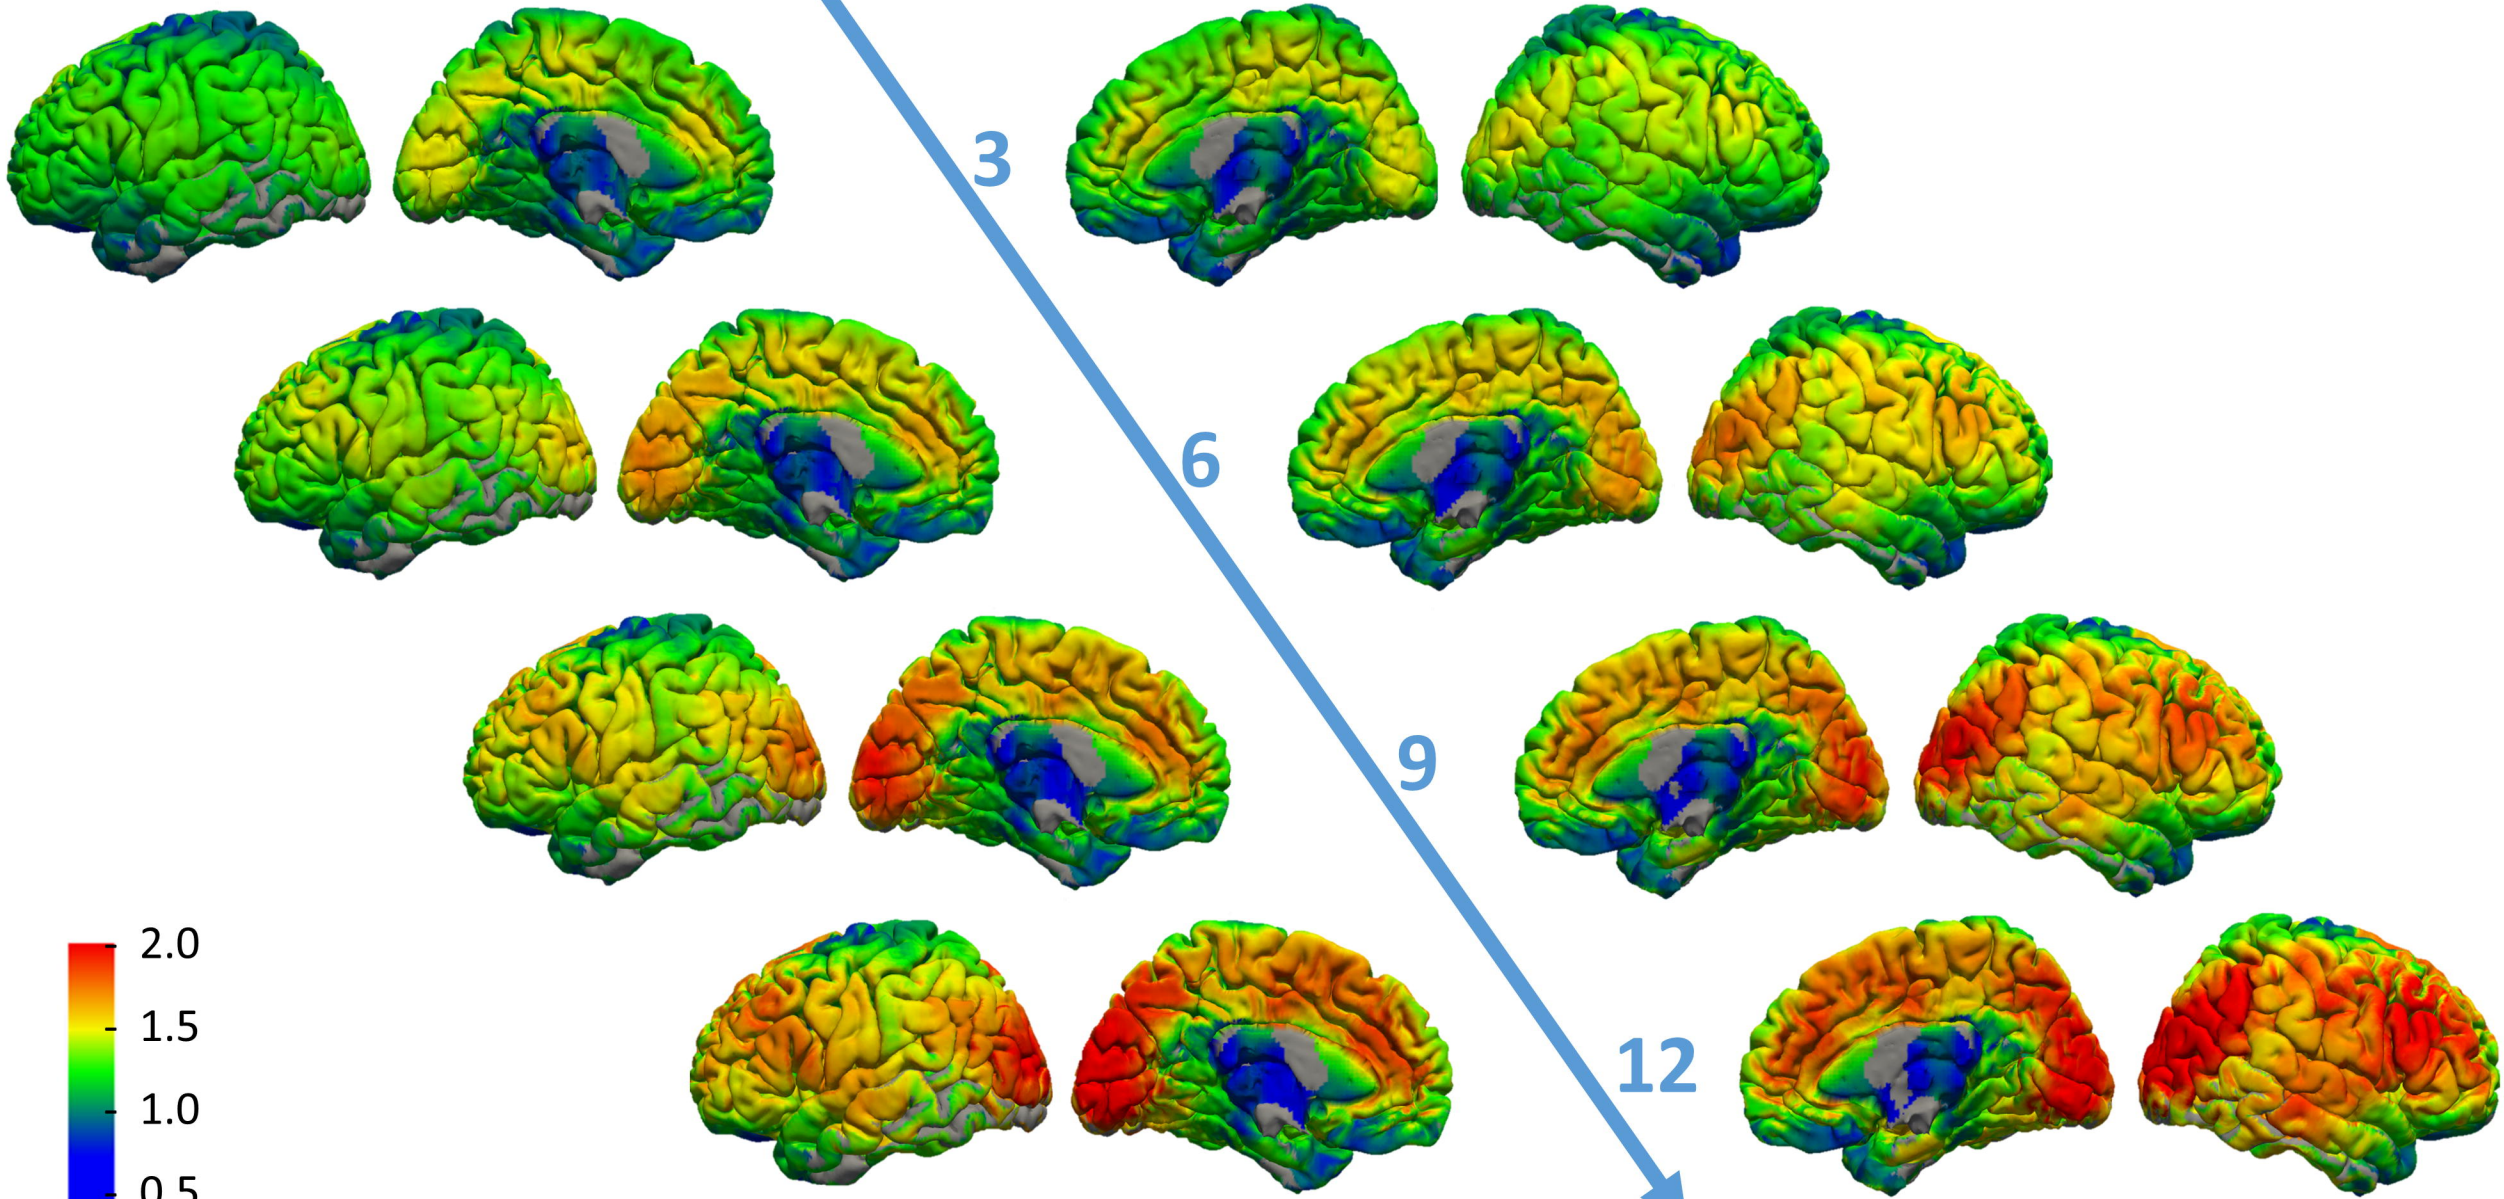

Source: http://biorxiv.org/content/10.1101/760843v3.full.pdf
