1 **Rest functional brain maturation during the first year of life**

2 Pierre Augé<sup>a†</sup> and Hervé Lemaître<sup>a,b†\*</sup>, Ana Saitovitch<sup>a</sup>, Jean-Marc Tacchella<sup>a</sup>, Ludovic Fillon<sup>a</sup>,  
3 Raphael Calmon<sup>a</sup>, Raphaël Lévy<sup>a</sup>, David Grévent<sup>a</sup>, Francis Brunelle<sup>a</sup>, Nathalie Boddaert<sup>a</sup>,  
4 Monica Zilbovicius<sup>a</sup>

5 **Author affiliation**

6 *“a” INSERM U1000, Department of Pediatric Radiology, Hôpital Necker Enfants Malades, AP-  
7 HP, Imagine Institute (UMR 1163), Paris Descartes University, Sorbonne Paris Cité University.*

8 *“b” Faculté de Médecine, Paris-Sud University, University of Paris-Saclay.*

9 *† Both authors contributed equally for this work*

10 *\*Correspondence and material request should be addressed to Hervé Lemaître*  
11 *([herve.lemaitre@u-psud.fr](mailto:herve.lemaitre@u-psud.fr))*

12 **Keywords**

13 Infants brain maturation

14 Rest cerebral blood flow

15 Neurodevelopment

16 ASL-MRI

17 **Summary**

18 The first year of life is a key period of brain development, characterized by dramatic  
19 structural and functional modifications. Here, we measured rest cerebral blood flow (CBF)  
20 modifications throughout babies' first year of life using arterial spin labeling magnetic  
21 resonance imaging sequence in 52 infants, from 3 to 12 months of age. Overall, global rest  
22 CBF significantly increased during this age span. In addition, we found marked regional  
23 differences in local functional brain maturation. While primary sensorimotor cortices and  
24 insula showed early maturation, temporal and prefrontal region presented great rest CBF  
25 increase across the first year of life. Moreover, we highlighted a late and remarkably  
26 synchronous maturation of the prefrontal and posterior superior temporal cortices. These  
27 different patterns of regional cortical rest CBF modifications reflect a timetable of local  
28 functional brain maturation and are consistent with baby's cognitive development within the  
29 first year of life.

30

31

## 32 **Introduction**

33 The human brain is still immature at birth and undergoes dynamic structural and functional  
34 processes throughout life. During the first year, the maturation of neural networks is a  
35 complex process that is particularly important to the baby's acquisition of cognitive and  
36 motor skills (1). At the cortical level, development comprises both gross morphometric  
37 changes and microstructural progression (2). The first year of life is therefore a critical phase  
38 of postnatal brain development.

39 Historically, much of what we know about the intricate processes of early brain development  
40 comes from post-mortem studies in human fetuses, neonates, and non-human primates (3-  
41 5). With the increasing availability of high-quality neuroimaging techniques, studying early  
42 human brain development in vivo in unprecedented detail is now feasible (6-9). These  
43 advances have led to exciting new insights into both healthy and atypical macroscale brain  
44 network development and have paved the way to bridge the gap between the brain's  
45 neurobiological architecture and its behavioral repertoire.

46 At the structural level, in neonates and infants, studies of cortical morphological  
47 development have focused on the modification of gray matter volume (10, 11), gyrification  
48 (12), deep sulcal landmark maturation (13), thickness and surface area maturation (14), as  
49 well as folding and fiber density (15). Structural brain imaging studies showed an increase in  
50 the gray matter volume during the first years of life (11), consistent with post-mortem  
51 studies, indicating rapid development of synapses and spines during this period (16-18).  
52 Indeed, throughout late gestation, rapid synaptogenesis results in an over-abundance of  
53 synapses (up to 150% of adult values) that are subsequently pruned throughout childhood  
54 and adolescence (19). During the first year of life, synaptogenesis is one of the most  
55 important maturational processes, and its timetable differs across cortical regions. Gilmore  
56 et al. described a posterior to anterior gradient of gray matter growth throughout the first  
57 year of life (20), consistent with regional differences that have been described in post-  
58 mortem studies, showing an increase in synaptic density, and therefore synaptogenesis,  
59 earlier in the sensory cortex and later in the prefrontal cortex (16). In general, studies have  
60 suggested a complex pattern of development that varies based on anatomical location and  
61 cortical metrics. In addition, across early development, cortical maturation exhibits

62 regionally specific asymmetry between the left and right hemispheres (12, 15). These  
63 changes continue throughout childhood and adolescence, with cortical thickness following  
64 different trajectories of thinning depending on the region, cortex type and gender (21, 22).

65 At the functional level, early brain development has been investigated using mainly three  
66 different approaches. Pioneer studies measuring metabolism and rest cerebral blood flow  
67 (CBF) were followed by activation studies using functional MRI and more recently resting  
68 state MRI studies investigating functional connectivity.

69 Rest cerebral metabolism and blood flow are an index of synaptic density, which allows the  
70 in vivo study of functional brain maturation using positron emission tomography (PET) and  
71 single-photon emission computed tomography (SPECT) (23). These studies revealed that  
72 infants' brains showed higher rest metabolism in subcortical structures and in the  
73 sensorimotor cortex than in other regions (24). In the newborn, the highest degree of  
74 glucose metabolism is in the primary sensory and motor cortex, cingulate cortex, thalamus,  
75 brain stem, cerebellar vermis and hippocampal region. During the first months of life, rest  
76 metabolism and CBF increase firstly within the primary sensory cortices, followed by the  
77 associative sensory cortices and finally within the prefrontal cortex at the end of the first  
78 year (24-26). At 2 to 3 months of age, glucose utilization increases in the parietal, the  
79 temporal and the primary visual cortices, basal ganglia, and cerebellar hemispheres.  
80 Between 6 and 12 months of age, glucose utilization increases in the frontal cortex. These  
81 metabolic changes correspond to the emergence of motor and cognitive abilities during the  
82 first year of life. However, these studies were limited by very low spatial resolution of the  
83 brain imaging devices. In addition, these techniques required administration of ionizing  
84 radiation and, therefore, have limited application in the pediatric population.

85 Following these pioneer studies, task-based fMRI contributed to present-day knowledge  
86 about brain maturation shortly after birth (27-29). These studies have provided important  
87 background on the brain's responses to sensory input during the early developmental phases  
88 of brain-behavior interactions. Adult-like activation patterns were observed in response to a  
89 variety of sensory stimuli, including tactile and proprioceptive stimulation (passive hand  
90 movement) (28, 30) as well as auditory (31) and olfactory (the odor of infant formula) (32).  
91 Functional MRI studies in 2- to 3-month-old infants demonstrated left-lateralized activation

92 of perisylvian regions, including the superior temporal gyrus, angular gyrus and Broca's area,  
93 in response to native language speech. The response followed a hierarchical pattern, with  
94 auditory regions being activated first, followed by superior temporal regions, the temporal  
95 poles and Broca's area in the inferior frontal cortex; a pattern that is highly consistent with  
96 language organization in the mature brain (29).

97 More recently, advances in brain imaging methodology have led to expanded application of  
98 resting state functional MRI (rs-fMRI) to the study of infants during the first years of life,  
99 providing insight into the maturation of multiple resting state networks (RSNs). Results show  
100 that the rate at which correlations within and between RSNs develop differs by network and  
101 closely reflect known rates of cortical development based on histological evidence (33). The  
102 sensorimotor (SM) and attention (AN) networks seem to be the earliest developing networks  
103 with their within-network synchronization largely established before birth. This replicates  
104 several reports showing the bilateral symmetric, adult-like topology of both networks at  
105 birth (34, 35) or even prenatally (36), indicating significant prenatal development of these 2  
106 networks. In the brains of term babies, rs-fMRI studies employing seed-based connectivity or  
107 independent component analyses have identified specific functional networks, including  
108 primary visual, auditory, sensorimotor networks and default mode and executive-control  
109 networks involved in heteromodal functions (7, 36, 37). Network analyses based on graph  
110 theory further revealed that the functional connectomes of infant brains already exhibited  
111 the small-world structure. Distinct from the adults, however, the hubs were largely confined  
112 to primary sensorimotor regions (38, 39). Taken together, these findings provide important  
113 insights into the early brain functional maturation process.

114 The emergence of arterial spin labeling (ASL), a technique that provides both non-invasive  
115 and regional cerebral blood flow quantification, offers new opportunities to investigate local  
116 rest brain function in neonates and children. ASL perfusion MRI uses magnetically labeled  
117 arterial blood water as a nominally diffusible flow tracer. By labeling the blood water  
118 proximal to the target imaging region, the perfusion signal is subsequently calculated by  
119 comparison with a separate image acquired using a control pulse without labeling the blood  
120 flow to remove the static background signal and control for magnetization transfer effects  
121 (40). Therefore, ASL MRI non-invasively assesses brain perfusion and allows for a  
122 quantitative measurement of rest CBF without the administration of contrast material or

123 exposure to ionizing radiation (41). This imaging method has been used to study rest CBF in  
124 neonates (42, 43), toddlers (44, 45) and older children (46), as well as, more recently, brain  
125 injuries in preterm babies (47).

126 Despite its importance for understanding normal brain development, we lack in knowledge  
127 of the development of local rest brain function characteristics during the first year of life. In  
128 this study, we aimed to describe the modifications of local rest CBF at the voxel-by-voxel  
129 level throughout the first year of life using ASL perfusion MRI.

## 130 **Results**

131 The relative values of global rest CBF increased with age from 3 to 12 months in the right ( $b$   
132  $= 0.0010$  unit/year,  $t_{(55,71)} = 6.64$ ,  $p = 1.36E-08$ ) and in the left hemisphere ( $b = 0.00078$   
133 unit/year,  $t_{(55,71)} = 5.34$ ,  $p = 1.74E-06$ ) with a greater age-related increase in the right as  
134 compared to the left ( $p = 0,0074$ , see Figure 1 and Table 1).

135 Qualitative analysis of the whole-brain voxel-wise maps showed a regionally heterogeneous  
136 age-related increase of the relative rest CBF values (see Figure 2 and SI Appendix, Movies S1  
137 to S4). The highest rest CBF at 3 months were observed within the sensorimotor and the  
138 primary visual cortices. The age-related increase in rest CBF progressed spatially from these  
139 regions. From the calcarine fissure, the rest CBF increased toward the visual associative  
140 regions up to the supramarginal and the precuneus regions. From the primary motor and  
141 sensory cortices, the rest CBF increased toward both the anterior and the posterior part of  
142 the brain. Anteriorly, through the anterior cingulate and the prefrontal cortices; posteriorly,  
143 through the insula and the superior temporal cortices. In contrast, the rest CBF was stable  
144 within the thalamus, the amygdala and the hippocampus. Between 9 and 12 months, the  
145 rest CBF increase was predominantly seen in the temporal and the prefrontal cortices. The  
146 regional right over left rest CBF asymmetry remained present throughout the whole studied  
147 period.

148 Quantitative analysis within the predefined regions of interest showed different trajectories  
149 of local rest functional maturation (see Table 1 and Figure 1). First, in a subset of subcortical  
150 regions including the hippocampus (right:  $b = 0.00019$  unit/year,  $t_{(75,14)} = 1.52$ ,  $p = 1$ ; left:  $b =$   
151  $-0.00022$  unit/year,  $t_{(75,14)} = -1.71$ ,  $p = 0,82$ ), the amygdala (right:  $b = 0.000026$  unit/year,

152  $t_{(92.77)} = 0.18$ ,  $p = 1$ ; left:  $b = -0.000076$  unit/year,  $t_{(92.77)} = -0.54$ ,  $p = 1$ ) and the thalamus  
153 (right:  $b = -0.00031$  unit/year,  $t_{(66.29)} = -2.62$ ,  $p = 0.097$ ; left:  $b = -0.00043$  unit/year,  $t_{(66.29)} = -$   
154  $3.66$ ,  $p = 0.0045$ ), the age-related rest CBF maturation through the first year of life remained  
155 stable indicating already matured regions at 3 months old. Second, the subset of cortical  
156 regions including the primary visual (right:  $b = 0.00094$  unit/year,  $t_{(59.09)} = 4.36$ ,  $p = 0.00047$ ;  
157 left:  $b = 0.00085$  unit/year,  $t_{(59.09)} = 3.94$ ,  $p = 0.0020$ ) and primary auditory cortices (right:  $b =$   
158  $0.00032$  unit/year,  $t_{(75.03)} = 1.64$ ,  $p = 0.94$ ; left:  $b = 0.00015$  unit/year,  $t_{(75.03)} = 0.78$ ,  $p = 1$ ), the  
159 insula (right:  $b = 0.00057$  unit/year,  $t_{(82.2)} = 4.29$ ,  $p = 0.00044$ , left:  $b = 0.00028$  unit/year,  
160  $t_{(82.2)} = 2.06$ ,  $p = 0.38$ ) and the sensorimotor cortex (right:  $b = 0.00061$  unit/year,  $t_{(59.33)} =$   
161  $2.89$ ,  $p = 0.048$ ; left:  $b = 0.00025$  unit/year,  $t_{(59.33)} = 1.19$ ,  $p = 1$ ) presented a small age-related  
162 rest CBF increase indicating early maturational process. Third, a subset of cortical regions  
163 including the prefrontal (right:  $b = 0.0014$  unit/year,  $t_{(58.9)} = 6.9$ ,  $p = 3.64E-08$ ; left:  $b = 0.0012$   
164 unit/year,  $t_{(58.9)} = 6.26$ ,  $p = 4.31E-07$ ) and the superior temporal cortices (right:  $b = 0.00095$   
165 unit/year,  $t_{(61.7)} = 5.4$ ,  $p = 1.00E-05$ ; left:  $b = 0.00060$  unit/year,  $t_{(61.7)} = 3.41$ ,  $p = 0.010$ )  
166 presented a high age-related rest CBF increase indicating late maturational process. Finally,  
167 faster right over left age-related rest CBF increase was more pronounced within the superior  
168 temporal ( $p = 0.032$ ) and sensorimotor cortices ( $p = 0.05$ ).

169 The age-related rest CBF changes computed for the exhaustive list of 45 regions of interest  
170 are available in SI Appendix, Table S3.

171

## 172 **Discussion**

173 Our study shows for the first time the dynamics of local rest functional brain maturation  
174 throughout the first year of life using a high-resolution non-invasive imaging method. Global  
175 rest CBF increased significantly from 3 to 12 months of age and this increase was more  
176 pronounced in the right than in the left hemisphere. Qualitative and quantitative analyses  
177 revealed marked regional differences in local functional brain maturation. Subcortical  
178 structures such as basal ganglia, thalamus, amygdala and hippocampus cortices are  
179 functionally mature at 3 months. At the cortical level, we observed two different  
180 maturational trajectories. Firstly, almost functionally mature regions at 3-month-old, with a  
181 slow age-related rest CBF increase between 3 to 12 months, included the primary  
182 auditory/visual cortices, the sensorimotor cortex and the insula. Secondly, late functionally

183 mature regions, with a high age-related increase rest CBF increase between 3 to 12 months,  
184 included the superior temporal and prefrontal cortices.

185 The increase in global rest CBF from 3 to 12 months of age that we describe here is  
186 consistent with pioneers PET and SPECT studies showing increase in rest metabolism and  
187 CBF during the same period (25, 26). Furthermore, we highlighted a hemispheric functional  
188 maturational asymmetry, with greater right than left global rest CBF increase during the first  
189 year. This agrees with previous studies that showed greater right than left rest CBF for these  
190 regions at birth (34) and from 1 year to 3 years old (48), supporting the hypothesis that the  
191 right hemisphere functionally matures earlier than the left. This asymmetry was also  
192 observed regionally for the superior temporal and sensorimotor cortices, consistently with  
193 data from rs-fMRI studies, also indicating asymmetry in the maturation of sensorimotor  
194 network (49).

195 Globally, our findings are in accordance with results from prior research based on histology,  
196 structural and rest functional brain imaging that has revealed distinct maturation trajectories  
197 of cortical regions and brain networks over the first year of life (10, 24, 33, 50). Firstly, at the  
198 histological level, post-mortem data showed that the time course of synaptogenesis differs  
199 across cortical regions. Indeed, a burst of synapse formation occurs between 3 and 4 months  
200 within primary visual, auditory cortices somatosensory cortices, which appeared already  
201 mature at 3 months of life (16, 51-53). Synaptogenesis in the frontal cortex begins about the  
202 same time as in visual cortex, but it does not reach its peak period until age 8 months,  
203 continuing thereafter through the second year of life (16, 54). These congruent findings  
204 strengthen our results as synaptic density is coupled to rest CBF as measured in our study.  
205 Secondly, concerning myelination, microstructural MRI maturational studies described a  
206 global maturation pattern characterized by early maturation of the sensorimotor cortex,  
207 followed by the other sensory cortices and then the associative cortices, including the  
208 prefrontal cortex (55, 56). Finally, recent data obtained with resting-state functional MRI  
209 studies allowed to describe maturational changes of functional networks during the first  
210 year of life (33, 36, 57, 58). Especially, Gao et al. have described a maturation sequence  
211 starting with primary sensorimotor/auditory and visual then attention/default-mode, and  
212 finally executive control, prefrontal, networks (57). These different sequences of functional  
213 network maturation fit with and complement our results. Therefore, data coming from our



214 study and previous rs-fMRI studies contribute to map a timetable of functional brain  
215 maturation during the first year of life.

216 Importantly, the spatial resolution of the ASL images allowed a highly accurate mapping of  
217 the age-related rest CBF changes. Consequently, we were able to describe insular local  
218 functional maturational evolution, which reaches its one-year pattern rather early, during  
219 the first months of life. A well-established literature and recently anatomical and resting-  
220 state functional MRI studies describe early human cortical development in areas close to the  
221 insula and radiating outward (59). This early insular maturation fits with its role in the  
222 integration of interoceptive stimuli, such as coolness, warmth and distension of the bladder,  
223 stomach or rectum (60), but also in the integration of external stimuli, notably pain (61). In  
224 addition, it is highly pertinent, since the insula is a key structure for the baby's development  
225 and essential to baby's survival.

226 The spatial resolution improvement also allowed us to describe for the first time a  
227 remarkably synchronous increase in rest CBF between the prefrontal and superior temporal  
228 cortices, both main components of the called "social brain" (62). The late maturation of the  
229 prefrontal cortex had been previously described by structural and functional brain imaging  
230 studies (10, 24). Noticeably, we describe here a late maturation within the posterior  
231 temporal regions during the first year of life, particularly within the posterior superior  
232 temporal sulcus, a region known to be highly implicated in social cognition (63).  
233 Interestingly, the late and synchronous maturation of these two cortical structures  
234 corresponds to the remarkable development of the baby's social skills through the first year  
235 of life.

236 To the best of our knowledge, only 2 studies using ASL imaging have focused on brain  
237 development during the first year of life, but a comparison with our results is limited due to  
238 important differences in their methodological approaches. Duncan et al. studied a sample of  
239 61 infants within a very narrow age-range from 3 to 5 months (45). Their main results  
240 describing a significantly greater rest CBF in the sensorimotor and occipital regions  
241 compared with the dorsolateral prefrontal in this age-range are in accordance with our  
242 results. In the second study, combining region of interest (ROI) and whole-brain analyses on  
243 rest CBF, Wang et al. investigated a group of 8 7-month-old infants to a group of 8 13-

244 month-old infants (44). Although they showed rest CBF increase in the 13-month-old group  
245 compared to the 7-month-old group mainly located in the frontal lobe, they did not examine  
246 directly the age-related rest CBF slopes.

247 This study has some limitations. First, we used a linear model for data analysis. Although  
248 cubic and quadratic fitting models did not improve our statistical models, it is improbable  
249 that a linear model exactly fits functional cortical maturation. This issue can be addressed in  
250 future studies by adding more and older subjects to further investigate the postnatal brain  
251 rest functional maturation trajectory. Second, due to their age, all infants received light  
252 premedication before the MRI to prevent motion artifacts, and all the scans were acquired  
253 during sleep. No significant influence neither on the regional distribution of CBF (7, 37, 64)  
254 nor in the default-mode network connectivity (65) has been reported to this premedication.  
255 Finally, our study was performed in a clinical pediatric population. To ensure that it could be  
256 comparable with a non-clinical population, we discarded all clinical indications for MRI that  
257 could affect brain anatomy, function and further neurodevelopmental disorders. In addition,  
258 all scans were strictly normal, and follow-up confirmed a normal psychomotor development.

259 Defining typical trajectories of brain maturation provides references for a better  
260 understanding of neurodevelopmental disorders and preterm effects on further brain  
261 maturation. Because CBF reflects regional changes in synaptic density, ASL offers a  
262 noninvasive approach to studying local brain function. In conclusion, to our knowledge, our  
263 study is the first to describe and characterize dynamics local functional brain maturation  
264 during the first year of life and provide insight into an important and vulnerable  
265 neurodevelopmental period.

#### 266 **Author contributions**

267 P.A. contributed to conception, analysis, interpretation and draft

268 H.L. contributed to conception, analysis, interpretation and draft

269 A.S. contributed to conception, interpretation and draft

270 J-M.T. contributed to analysis and draft

271 L.F. contributed to interpretation and draft

272 R.C. contributed to acquisition

273 R.L. contributed to acquisition

274 D.G contributed to acquisition

275 F.B. contributed to acquisition

276 N.B. contributed to conception and acquisition

277 M.B. contributed to conception, interpretation and draft

278

## 279 **Declaration of Interests**

280 The authors declare no competing interests.

281

## 282 **Figure Legends**

283 **Figure 1:** Age-related changes of the rest CBF values in predefined regions of interest  
284 between 3 and 12 months of age. The whole brain in red, subset of stable subcortical regions  
285 (hippocampus, amygdala and thalamus) in purple, subset of early maturing cortical regions  
286 (primary visual and auditory cortices, insula and sensorimotor cortex) in green, subset of late  
287 maturing cortical regions (prefrontal and superior temporal cortices) in blue. Each dot  
288 represents a subject, and each line represents the estimated regression based on a linear  
289 model for the left (empty dots and dashed line) and right (filled dots and solid line)  
290 hemispheres. The rest CBF values are normalized by the rest CBF measured within the basal  
291 ganglia and presented in arbitrary unit.

292 **Figure 2:** rest CBF values at 3, 6, 9 and 12 months of age displayed on the medial and lateral  
293 view of the left and right hemispheres. The rest CBF values are normalized by the rest CBF  
294 measured within the basal ganglia and presented in arbitrary unit. Surface rendering was  
295 done using mri\_vol2surf from freesurfer (<https://surfer.nmr.mgh.harvard.edu/>).

296

## 297 **STAR Methods**

298 **Subject.** Eighty-five babies from the Necker-Enfants-Malades hospital were initially included  
299 in this study. The inclusion criteria were normal clinical multimodal MRI, absence of

300 prematurity, neurological or cranial pathology, parent's consanguinity or abnormal  
301 psychomotor development. Were included infants presenting syndromes that are not  
302 originally neurological, mainly dermatological or ophthalmological, but request an MRI to  
303 discard infrequent associated brain abnormalities, that may be present in a small percentage  
304 of cases (see SI Appendix, Table S1). Normal psychomotor development was assured in  
305 follow-up consultations. Our final sample included 52 babies (29 girls) from 3 to 12 months  
306 of age in our study, including 10 babies at 3 and 4 months (90 to 120 days), 14 at 5 and 6  
307 months (120 to 180 days), 14 at 7 and 8 months (180 to 240 days), 7 at 9 and 10 months  
308 (240 to 300 days), 7 at 11 and 12 months (300 to 375 days). The Ethical Committee of French  
309 Public Hospitals approved this study and the written informed consent was obtained for all  
310 participants.

311 **MRI acquisition.** All MRI exams included T1-weighted and ASL sequences and were acquired  
312 on a General Electric Signa 1.5T MRI scanner in the Necker-Enfants-malades hospital (See SI  
313 Appendix, Table S2 and SI Methods for details). Due to the age of the babies, all of them  
314 received premedication before their MRI (pentobarbital, 7.5 mg/kg) to prevent motion  
315 artifacts. It has been shown that barbiturates do not have any influence on the regional  
316 distribution of CBF or on default mode resting state network (7, 37, 66, 67).

317 **Data processing and treatment.** MRI images were pre-processed using Statistical Parametric  
318 Mapping (SPM8 software, Wellcome Department of Cognitive Neurology London  
319 [www.fil.ion.ucl.ac.uk/spm/software/spm8](http://www.fil.ion.ucl.ac.uk/spm/software/spm8)) implemented in Matlab (Mathworks Inc.,  
320 Sherborn, MA, USA) and analyzed using a voxel-based approach (See SI Appendix, SI  
321 Methods for details). Native 3D-T1-weighted images were segmented into gray matter,  
322 white matter and cerebrospinal fluid using the Infant Brain Probability Templates  
323 (<https://irc.cchmc.org/software/infant.php>). The ASL images were first co-registered to the  
324 corresponding native gray matter images. Then, co-registered ASL images were spatially  
325 normalized using the deformation matrices from the segmentation process. The resulting  
326 ASL images were smoothed using an isotropic Gaussian filter of 10 mm. ASL acquisition  
327 provides a high-quality image of quantitative CBF. Motion in ASL acquisition is mainly  
328 characterized by signal outside of the brain, often recognizable as signal from layers of skin  
329 or fat, that can be detected by on-the-fly expert visual analysis. Therefore, we performed a  
330 two steps quality control. The first one by an expert radiologist right after acquisition (NB)

331 and the second one by an imaging processing expert engineer (HL) before pre-processing to  
332 discard images with artifacts such as motion, aliasing, ghosting, spikes, low signal to noise  
333 ratio.

334 **Image analysis.** We normalized rest CBF within the ASL images by the mean CBF measured  
335 within the basal ganglia to avoid major variations in rest CBF due to cardiac blood flow (68,  
336 69) and blood pressure labilities (70). The basal ganglia was specifically chosen in our study  
337 as it is one of the earliest structures to matures (24) and regression analyses did not show  
338 any age-related variations in the rest CBF of this region within our age range ( $\beta = 5.2 \times 10^{-4}$   
339 unit/year,  $t_{(50)} = 0.045$ ,  $p = 0.96$ ). The regional rest CBF was expressed as percentage of basal  
340 ganglia rest CBF and presented in arbitrary unit.

341 We then performed whole-brain voxel-wise analyses of the 52 images within the general  
342 linear model framework using SPM8 with age as an independent variable. The analyses were  
343 constrained to gray matter tissue only by thresholding the analysis mask to 40% of the mean  
344 gray matter image of our sample.

345 We also extracted mean rest CBF from 92 regions of interest (hemispheres and regions)  
346 using the AAL parcellation toolbox (71). In addition, a further analysis was performed by  
347 selecting and merging regions of interested based on their relevance in term of  
348 development. We selected the hippocampus, the amygdala, the thalamus, the primary visual  
349 and auditory cortices, the insula, the superior temporal cortex. We formed the sensorimotor  
350 cortex by merging the precentral and postcentral regions, and the prefrontal cortex by  
351 merging the inferior, middle and superior frontal regions and the gyrus rectus. All analyses  
352 were performed using R (<http://cran.r-project.org>). Age-related regressions were assessed  
353 using linear mixed models to account for the intra-subject left and right hemisphere  
354 measurements. Age, hemisphere and age-by-hemisphere interaction were entered as fixed  
355 effects and subject as nested random effect.

356 **Data and Code Availability Statement.** The data that support the findings of this study are  
357 available on request from the corresponding author [HL]. The data are not publicly available  
358 due to them containing information that could compromise research participant consent.

359

## 360 **References**

- 361 1. Kagan J & Herschkowitz N (2005) *A Young Mind in a Growing Brain* (Lawrence Erlbaum  
362 Associates, Mahwah, NJ, US).
- 363 2. Dubois J, *et al.* (2014) The early development of brain white matter: a review of imaging  
364 studies in fetuses, newborns and infants. *Neuroscience* 276:48-71.
- 365 3. Goldman-Rakic PS (1987) Development of cortical circuitry and cognitive function. *Child Dev*  
366 58(3):601-622.
- 367 4. Innocenti GM & Price DJ (2005) Exuberance in the development of cortical networks. *Nat Rev*  
368 *Neurosci* 6(12):955-965.
- 369 5. Kostovic I, Judas M, Rados M, & Hrabac P (2002) Laminar organization of the human fetal  
370 cerebrum revealed by histochemical markers and magnetic resonance imaging. *Cereb Cortex*  
371 12(5):536-544.
- 372 6. Ball G, *et al.* (2014) Rich-club organization of the newborn human brain. *Proc Natl Acad Sci U*  
373 *S A* 111(20):7456-7461.
- 374 7. Fransson P, *et al.* (2007) Resting-state networks in the infant brain. *Proc Natl Acad Sci U S A*  
375 104(39):15531-15536.
- 376 8. Partridge SC, *et al.* (2004) Diffusion tensor imaging: serial quantitation of white matter tract  
377 maturity in premature newborns. *Neuroimage* 22(3):1302-1314.
- 378 9. van den Heuvel MP, *et al.* (2015) The Neonatal Connectome During Preterm Brain  
379 Development. *Cereb Cortex* 25(9):3000-3013.
- 380 10. Gilmore JH, *et al.* (2012) Longitudinal development of cortical and subcortical gray matter  
381 from birth to 2 years. *Cereb Cortex* 22(11):2478-2485.
- 382 11. Knickmeyer RC, *et al.* (2008) A structural MRI study of human brain development from birth  
383 to 2 years. *J Neurosci* 28(47):12176-12182.
- 384 12. Li G, *et al.* (2014) Mapping longitudinal development of local cortical gyrification in infants  
385 from birth to 2 years of age. *J Neurosci* 34(12):4228-4238.
- 386 13. Meng Y, Li G, Lin W, Gilmore JH, & Shen D (2014) Spatial distribution and longitudinal  
387 development of deep cortical sulcal landmarks in infants. *Neuroimage* 100:206-218.
- 388 14. Lyall AE, *et al.* (2015) Dynamic Development of Regional Cortical Thickness and Surface Area  
389 in Early Childhood. *Cereb Cortex* 25(8):2204-2212.
- 390 15. Nie J, *et al.* (2014) Longitudinal development of cortical thickness, folding, and fiber density  
391 networks in the first 2 years of life. *Hum Brain Mapp* 35(8):3726-3737.
- 392 16. Huttenlocher PR & Dabholkar AS (1997) Regional differences in synaptogenesis in human  
393 cerebral cortex. *J Comp Neurol* 387(2):167-178.
- 394 17. Petanjek Z, *et al.* (2011) Extraordinary neoteny of synaptic spines in the human prefrontal  
395 cortex. *Proc Natl Acad Sci U S A* 108(32):13281-13286.
- 396 18. Webster MJ, Elashoff M, & Weickert CS (2011) Molecular evidence that cortical synaptic  
397 growth predominates during the first decade of life in humans. *Int J Dev Neurosci* 29(3):225-  
398 236.
- 399 19. Huttenlocher PR (1979) Synaptic density in human frontal cortex - developmental changes  
400 and effects of aging. *Brain Res* 163(2):195-205.
- 401 20. Gilmore JH, *et al.* (2007) Regional gray matter growth, sexual dimorphism, and cerebral  
402 asymmetry in the neonatal brain. *J Neurosci* 27(6):1255-1260.
- 403 21. Shaw P, *et al.* (2008) Neurodevelopmental trajectories of the human cerebral cortex. *J*  
404 *Neurosci* 28(14):3586-3594.
- 405 22. Sowell ER, *et al.* (2004) Longitudinal mapping of cortical thickness and brain growth in normal  
406 children. *J Neurosci* 24(38):8223-8231.
- 407 23. Leenders KL, *et al.* (1990) Cerebral blood flow, blood volume and oxygen utilization. Normal  
408 values and effect of age. *Brain* 113 ( Pt 1):27-47.

- 409 24. Chugani HT & Phelps ME (1986) Maturational changes in cerebral function in infants  
410 determined by 18FDG positron emission tomography. *Science* 231(4740):840-843.
- 411 25. Chugani HT, Phelps ME, & Mazziotta JC (1987) Positron emission tomography study of human  
412 brain functional development. *Ann Neurol* 22(4):487-497.
- 413 26. Chiron C, et al. (1992) Changes in regional cerebral blood flow during brain maturation in  
414 children and adolescents. *Journal of nuclear medicine : official publication, Society of Nuclear  
415 Medicine* 33(5):696-703.
- 416 27. Allievi AG, et al. (2016) Maturation of Sensori-Motor Functional Responses in the Preterm  
417 Brain. *Cereb Cortex* 26(1):402-413.
- 418 28. Arichi T, et al. (2010) Somatosensory cortical activation identified by functional MRI in  
419 preterm and term infants. *Neuroimage* 49(3):2063-2071.
- 420 29. Dehaene-Lambertz G, et al. (2006) Functional organization of perisylvian activation during  
421 presentation of sentences in preverbal infants. *Proc Natl Acad Sci U S A* 103(38):14240-  
422 14245.
- 423 30. Erberich SG, et al. (2006) Somatosensory lateralization in the newborn brain. *Neuroimage*  
424 29(1):155-161.
- 425 31. Anderson AW, et al. (2001) Neonatal auditory activation detected by functional magnetic  
426 resonance imaging. *Magn Reson Imaging* 19(1):1-5.
- 427 32. Arichi T, et al. (2013) Computer-controlled stimulation for functional magnetic resonance  
428 imaging studies of the neonatal olfactory system. *Acta Paediatr* 102(9):868-875.
- 429 33. Smyser CD & Neil JJ (2015) Use of resting-state functional MRI to study brain development  
430 and injury in neonates. *Semin Perinatol* 39(2):130-140.
- 431 34. Lin PY, et al. (2013) Regional and hemispheric asymmetries of cerebral hemodynamic and  
432 oxygen metabolism in newborns. *Cereb Cortex* 23(2):339-348.
- 433 35. Gao W, et al. (2013) The synchronization within and interaction between the default and  
434 dorsal attention networks in early infancy. *Cereb Cortex* 23(3):594-603.
- 435 36. Smyser CD, et al. (2010) Longitudinal analysis of neural network development in preterm  
436 infants. *Cereb Cortex* 20(12):2852-2862.
- 437 37. Doria V, et al. (2010) Emergence of resting state networks in the preterm human brain. *Proc  
438 Natl Acad Sci U S A* 107(46):20015-20020.
- 439 38. Fransson P, Aden U, Blennow M, & Lagercrantz H (2011) The functional architecture of the  
440 infant brain as revealed by resting-state fMRI. *Cereb Cortex* 21(1):145-154.
- 441 39. Gao W, et al. (2011) Temporal and spatial evolution of brain network topology during the  
442 first two years of life. *PLoS One* 6(9):e25278.
- 443 40. Williams DS, Detre JA, Leigh JS, & Koretsky AP (1992) Magnetic resonance imaging of  
444 perfusion using spin inversion of arterial water. *Proceedings of the National Academy of  
445 Sciences of the United States of America* 89(1):212-216.
- 446 41. Detre JA & Alsop DC (1999) Perfusion magnetic resonance imaging with continuous arterial  
447 spin labeling: methods and clinical applications in the central nervous system. *Eur J Radiol*  
448 30(2):115-124.
- 449 42. Ouyang M, et al. (2017) Heterogeneous increases of regional cerebral blood flow during  
450 preterm brain development: Preliminary assessment with pseudo-continuous arterial spin  
451 labeled perfusion MRI. *Neuroimage* 147:233-242.
- 452 43. De Vis JB (2012) Arterial Spin Labeling Magnetic Resonance Imaging to Assess Neonatal Brain  
453 Perfusion. *Archives of Disease in Childhood* 97.
- 454 44. Wang Z, et al. (2008) Assessment of functional development in normal infant brain using  
455 arterial spin labeled perfusion MRI. *Neuroimage* 39(3):973-978.
- 456 45. Duncan AF, et al. (2014) Regional cerebral blood flow in children from 3 to 5 months of age.  
457 *AJNR Am J Neuroradiol* 35(3):593-598.
- 458 46. Biagi L, et al. (2007) Age dependence of cerebral perfusion assessed by magnetic resonance  
459 continuous arterial spin labeling. *J Magn Reson Imaging* 25(4):696-702.

- 460 47. Tortora D, *et al.* (2017) Prematurity and brain perfusion: Arterial spin labeling MRI.  
461 *Neuroimage Clin* 15:401-407.
- 462 48. Chiron C, *et al.* (1997) The right brain hemisphere is dominant in human infants. *Brain* 120 (  
463 Pt 6):1057-1065.
- 464 49. Pelphrey KA, *et al.* (2004) Development of visuospatial short-term memory in the second half  
465 of the 1st year. *Developmental psychology* 40(5):836-851.
- 466 50. Zhang H, Shen D, & Lin W (2019) Resting-state functional MRI studies on infant brains: A  
467 decade of gap-filling efforts. *Neuroimage* 185:664-684.
- 468 51. Huttenlocher PR (1990) Morphometric study of human cerebral cortex development.  
469 *Neuropsychologia* 28(6):517-527.
- 470 52. Marin-Padilla M (1970) Prenatal and early postnatal ontogenesis of the human motor cortex:  
471 a golgi study. I. The sequential development of the cortical layers. *Brain Res* 23(2):167-183.
- 472 53. Michel AE & Garey LJ (1984) The development of dendritic spines in the human visual cortex.  
473 *Hum Neurobiol* 3(4):223-227.
- 474 54. Kostovic I, Judas M, Petanjek Z, & Simic G (1995) Ontogenesis of goal-directed behavior:  
475 anatomo-functional considerations. *Int J Psychophysiol* 19(2):85-102.
- 476 55. Dubois J, *et al.* (2008) Microstructural correlates of infant functional development: example  
477 of the visual pathways. *J Neurosci* 28(8):1943-1948.
- 478 56. Deoni SC, *et al.* (2011) Mapping infant brain myelination with magnetic resonance imaging. *J*  
479 *Neurosci* 31(2):784-791.
- 480 57. Gao W, *et al.* (2015) Functional Network Development During the First Year: Relative  
481 Sequence and Socioeconomic Correlations. *Cereb Cortex* 25(9):2919-2928.
- 482 58. Wen X, *et al.* (2019) First-year development of modules and hubs in infant brain functional  
483 networks. *Neuroimage* 185:222-235.
- 484 59. Alcauter S, Lin W, Keith Smith J, Gilmore JH, & Gao W (2015) Consistent anterior-posterior  
485 segregation of the insula during the first 2 years of life. *Cereb Cortex* 25(5):1176-1187.
- 486 60. Craig AD (2009) How do you feel--now? The anterior insula and human awareness. *Nat Rev*  
487 *Neurosci* 10(1):59-70.
- 488 61. Mazzola L, Isnard J, Peyron R, Guenot M, & Mauguiere F (2009) Somatotopic organization of  
489 pain responses to direct electrical stimulation of the human insular cortex. *Pain* 146(1-2):99-  
490 104.
- 491 62. Brothers L, Ring B, & Kling A (1990) Response of neurons in the macaque amygdala to  
492 complex social stimuli. *Behavioural brain research* 41(3):199-213.
- 493 63. Zilbovicius M, *et al.* (2006) Autism, the superior temporal sulcus and social perception.  
494 *Trends Neurosci* 29(7):359-366.
- 495 64. Carsin-Vu A, *et al.* (2018) Measurement of pediatric regional cerebral blood flow from 6  
496 months to 15 years of age in a clinical population. *Eur J Radiol* 101:38-44.
- 497 65. Greicius MD, *et al.* (2008) Persistent default-mode network connectivity during light  
498 sedation. *Hum Brain Mapp* 29(7):839-847.
- 499 66. Zilbovicius M, *et al.* (2000) Temporal lobe dysfunction in childhood autism: a PET study.  
500 Positron emission tomography. *The American journal of psychiatry* 157(12):1988-1993.
- 501 67. Mishra LD (2002) Cerebral blood flow and anaesthesia: a review. *Indian Journal of*  
502 *Anaesthesia* 46(2):87-95.
- 503 68. Varela M, Groves AM, Arichi T, & Hajnal JV (2012) Mean cerebral blood flow measurements  
504 using phase contrast MRI in the first year of life. *NMR Biomed* 25(9):1063-1072.
- 505 69. Licht DJ, *et al.* (2004) Preoperative cerebral blood flow is diminished in neonates with severe  
506 congenital heart defects. *J Thorac Cardiovasc Surg* 128(6):841-849.
- 507 70. Hardy P, Varma DR, & Chemtob S (1997) Control of cerebral and ocular blood flow  
508 autoregulation in neonates. *Pediatr Clin North Am* 44(1):137-152.
- 509 71. Tzourio-Mazoyer N, *et al.* (2002) Automated anatomical labeling of activations in SPM using a  
510 macroscopic anatomical parcellation of the MNI MRI single-subject brain. *Neuroimage*  
511 15(1):273-289.





513

514

515

516

517

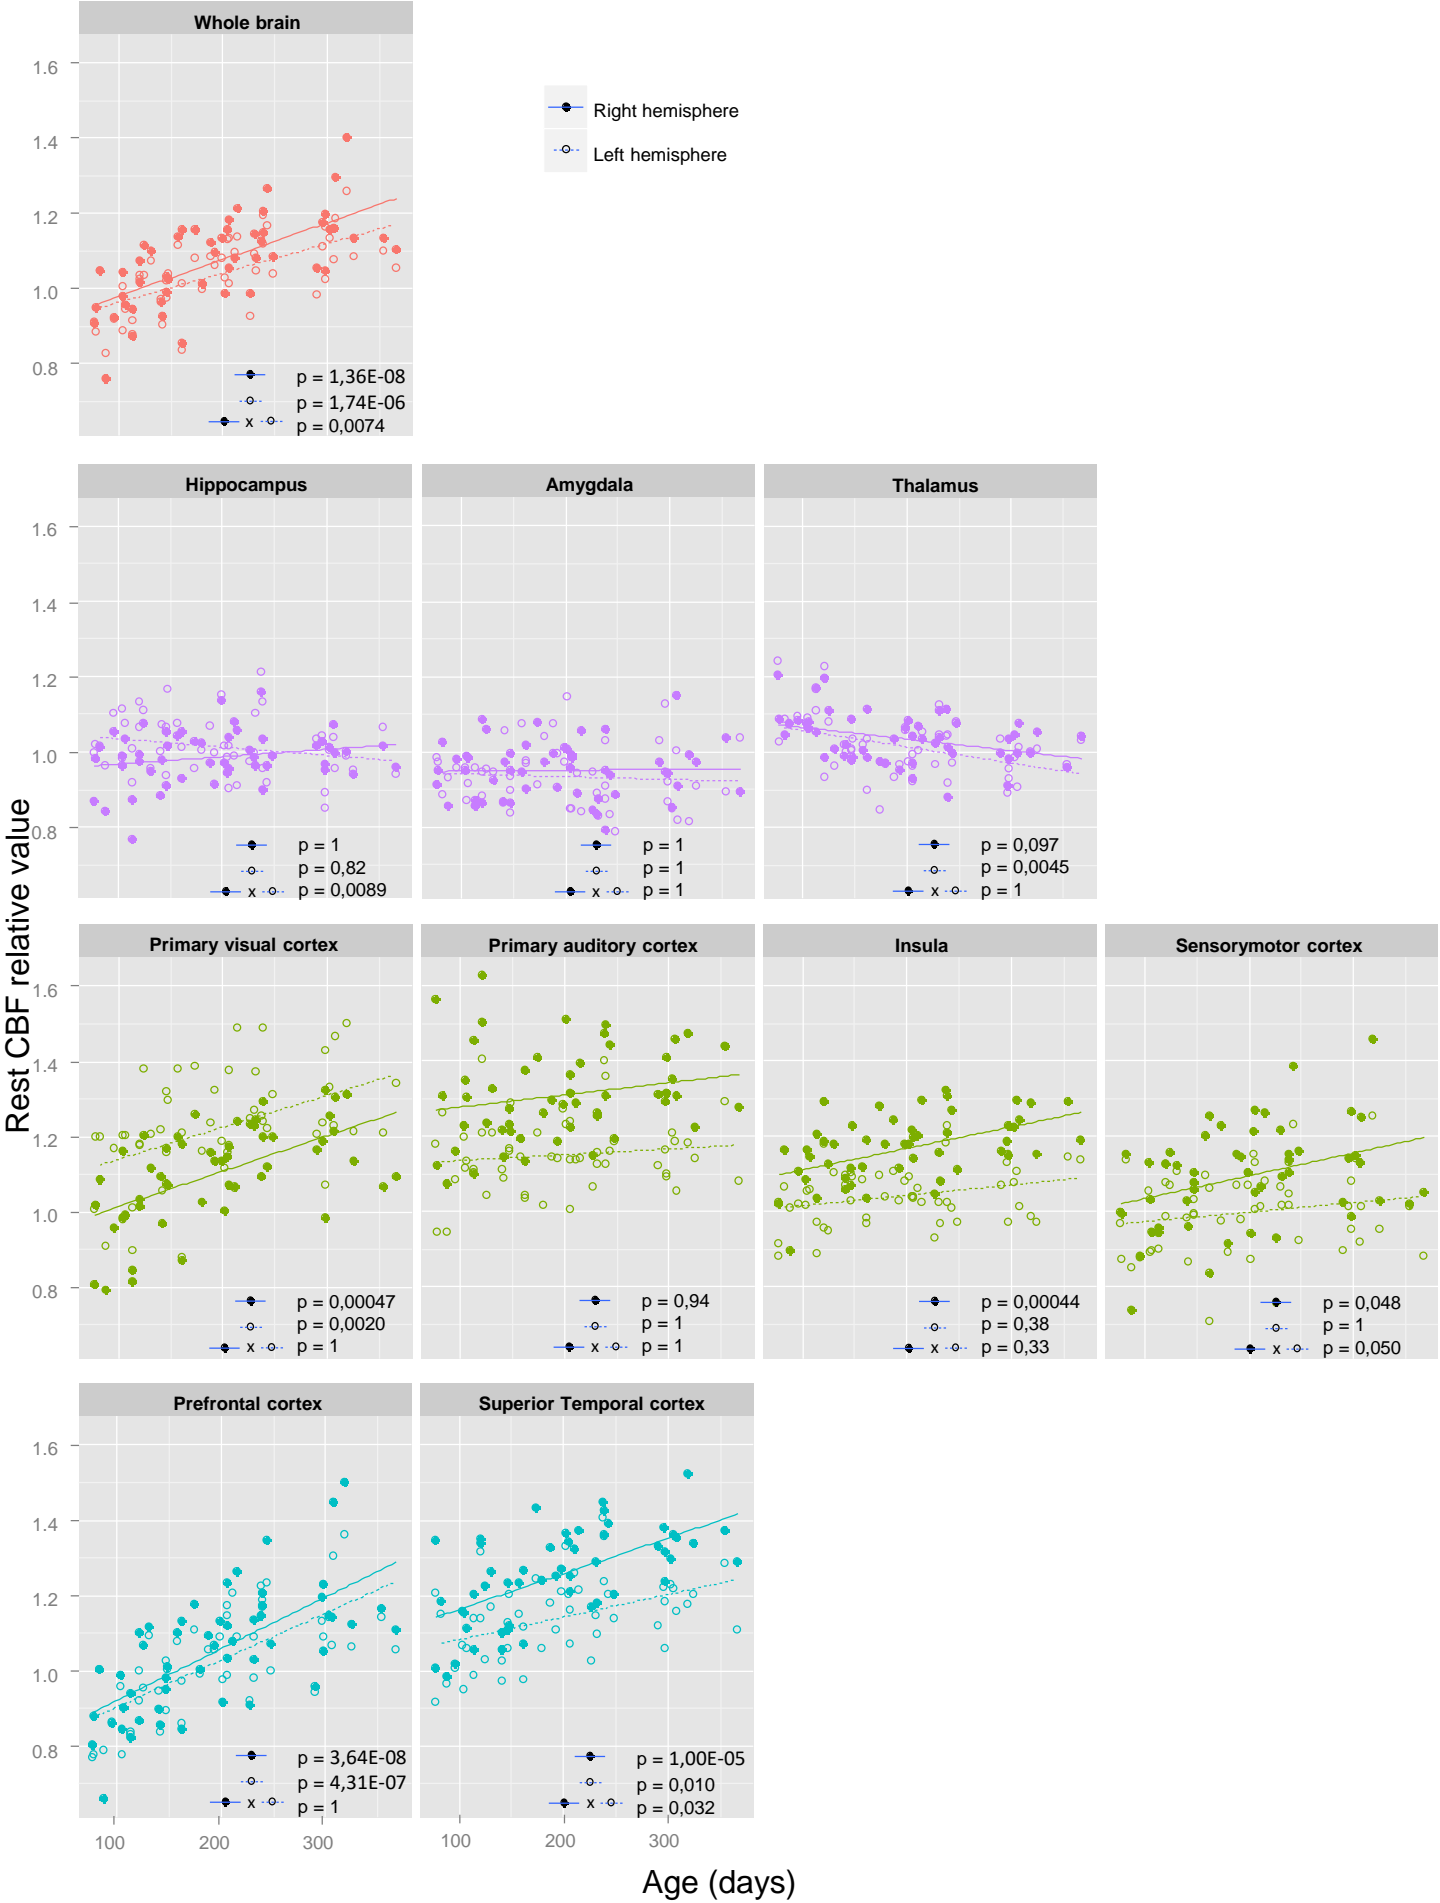

**Left**

**Right**

3

6

9

12

**Age (months)**

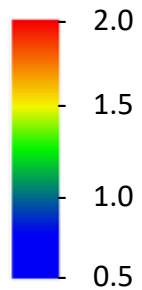

Rest CBF  
relative value

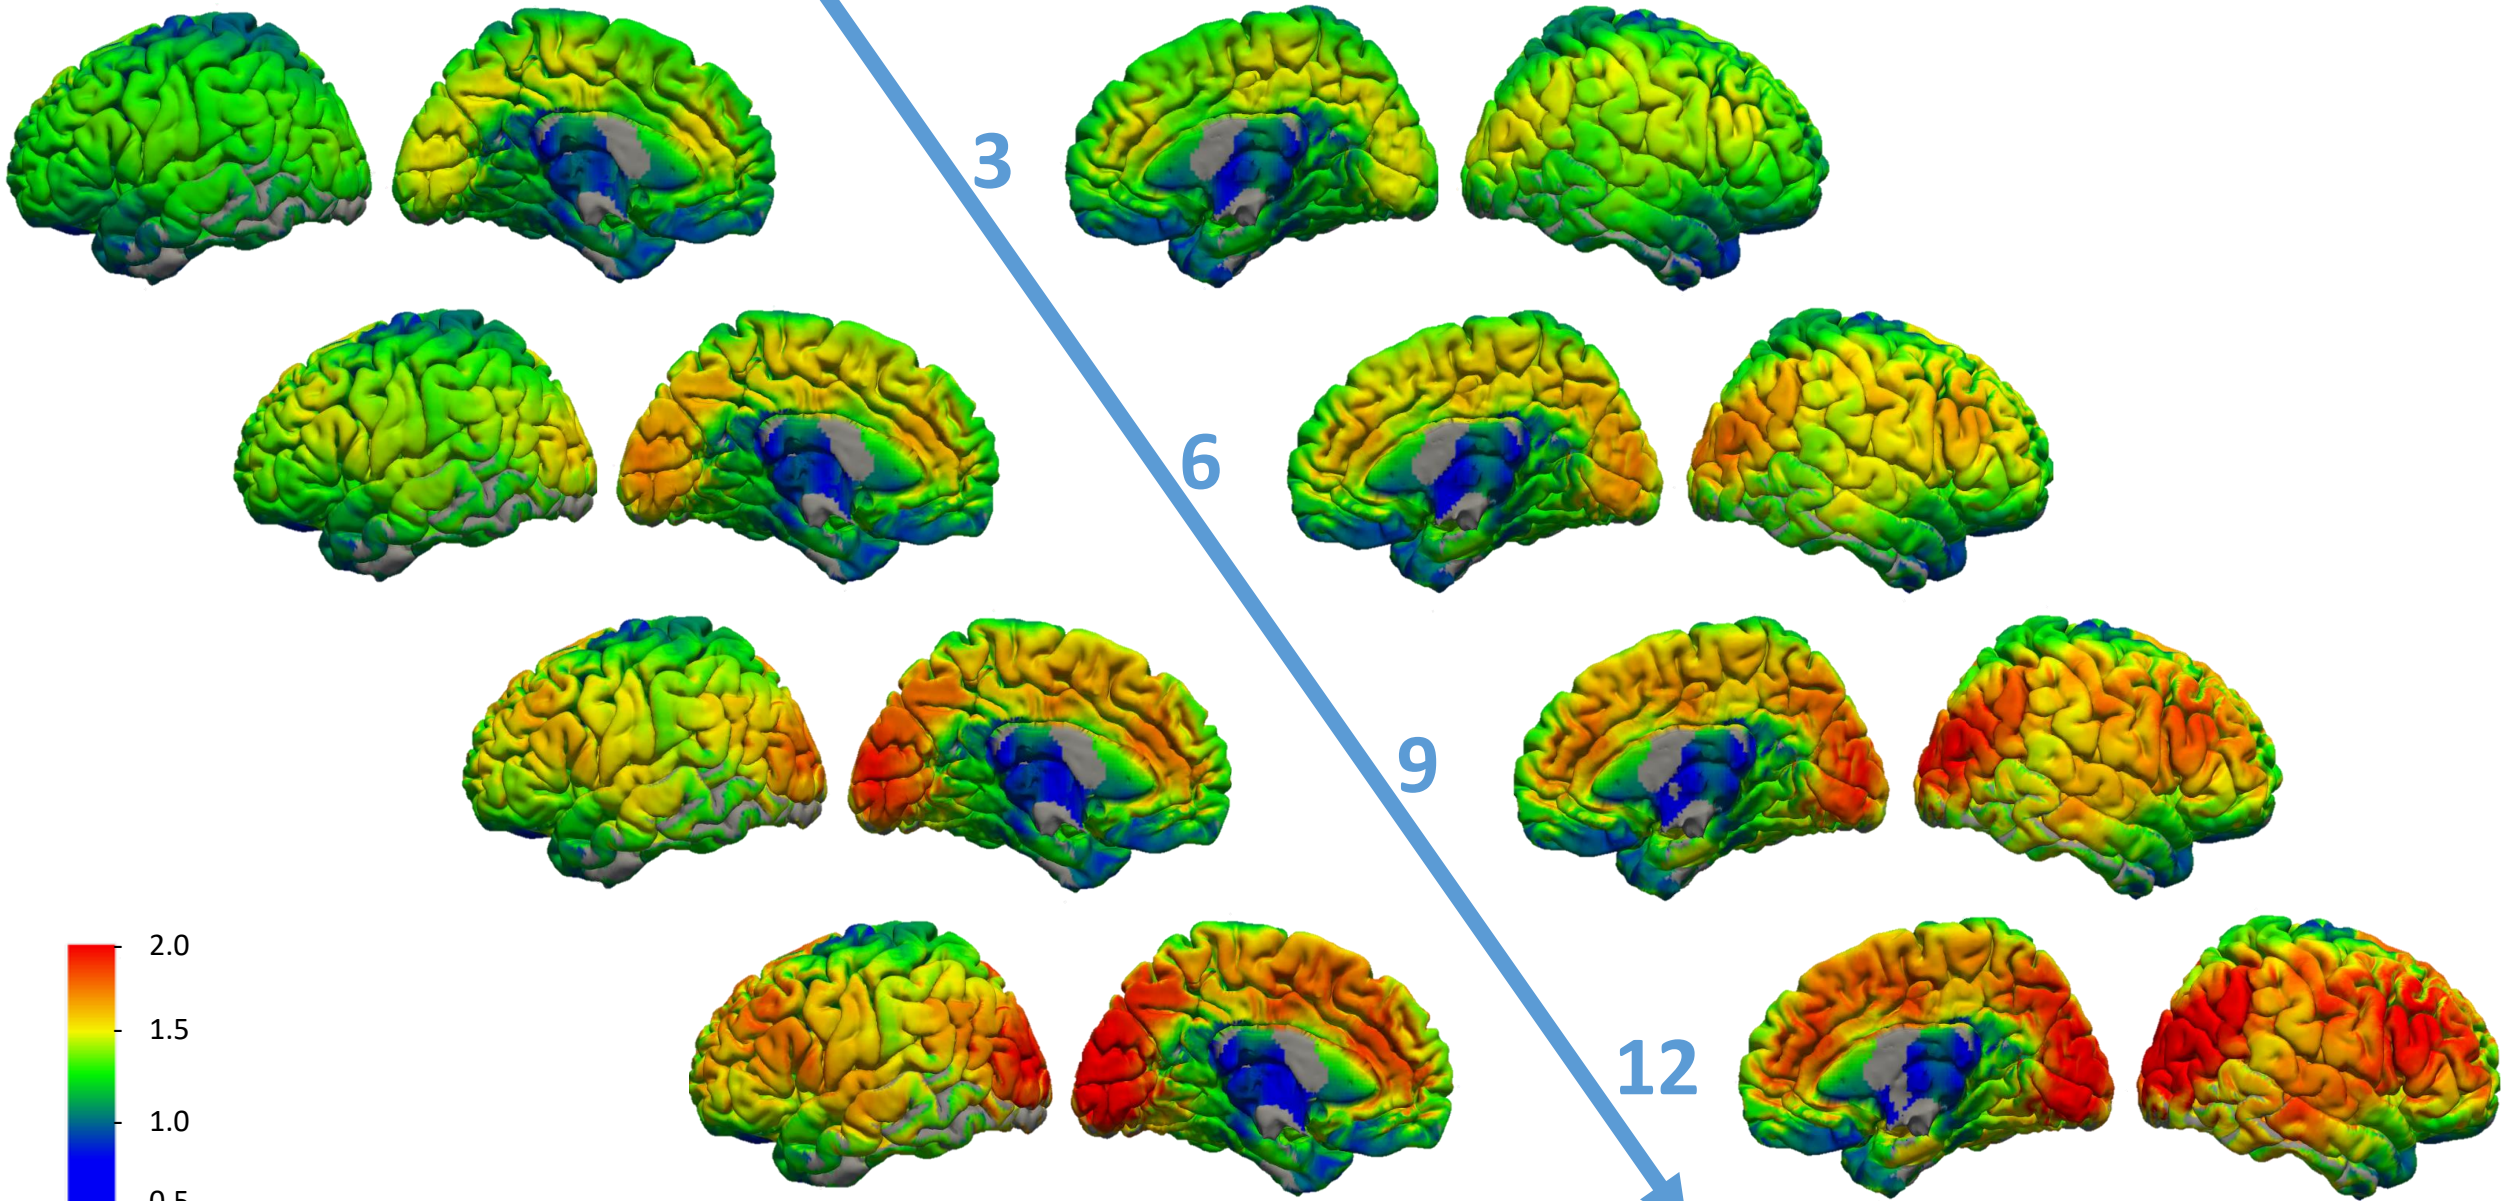

**Table 1:** Age-related changes of the rest CBF values between 3 and 12 months of age.

|                                  | Hemisphere | estimate (unit/day) | t(degree of freedom) = t-value | p-value (age) | p-value (age x hemisphere) |
|----------------------------------|------------|---------------------|--------------------------------|---------------|----------------------------|
| <b>Whole brain</b>               | Right      | 0,0010              | t(55.71) = 6.64                | 1,36E-08      | 0,0074                     |
|                                  | Left       | 0,00078             | t(55.71) = 5.34                | 1,74E-06      |                            |
| <b>Hippocampus†</b>              | Right      | 0,00019             | t(75.14) = 1.52                | 1             | 0,0089                     |
|                                  | Left       | -0,00022            | t(75.14) = -1.71               | 0,82          |                            |
| <b>Amygdala†</b>                 | Right      | 0,000026            | t(92.77) = 0.18                | 1             | 1                          |
|                                  | Left       | -0,000076           | t(92.77) = -0.54               | 1             |                            |
| <b>Thalamus†</b>                 | Right      | -0,00031            | t(66.29) = -2.62               | 0,097         | 1                          |
|                                  | Left       | -0,00043            | t(66.29) = -3.66               | 0,0045        |                            |
| <b>Primary visual cortex†</b>    | Right      | 0,00094             | t(59.09) = 4.36                | 0,00047       | 1                          |
|                                  | Left       | 0,00085             | t(59.09) = 3.94                | 0,0020        |                            |
| <b>Primary auditory cortex†</b>  | Right      | 0,00032             | t(75.03) = 1.64                | 0,94          | 1                          |
|                                  | Left       | 0,00015             | t(75.03) = 0.78                | 1             |                            |
| <b>Insula†</b>                   | Right      | 0,00057             | t(82.2) = 4.29                 | 0,00044       | 0,33                       |
|                                  | Left       | 0,00028             | t(82.2) = 2.06                 | 0,38          |                            |
| <b>Sensorymotor cortex†</b>      | Right      | 0,00061             | t(59.33) = 2.89                | 0,048         | 0,050                      |
|                                  | Left       | 0,00025             | t(59.33) = 1.19                | 1             |                            |
| <b>Prefrontal cortex†</b>        | Right      | 0,0014              | t(58.9) = 6.9                  | 3,64E-08      | 1                          |
|                                  | Left       | 0,0012              | t(58.9) = 6.26                 | 4,31E-07      |                            |
| <b>Superior Temporal cortex†</b> | Right      | 0,00095             | t(61.7) = 5.4                  | 1,00E-05      | 0,032                      |
|                                  | Left       | 0,00060             | t(61.7) = 3.41                 | 0,010         |                            |

†: p- values Bonferroni corrected for the number of sub-parts of the brain.

rest CBF values are normalized by the rest CBF measured within the basal ganglia and presented in arbitrary unit.
